# Supplementary material for: An automated protocol to construct flexibility parameters for classical forcefields: applications to metal–organic frameworks
Source: RSC Adv. 2024 Jul 19;14(31):22714–62. doi: 10.1039/d4ra01859a (PMC11258866; doi:10.1039/d4ra01859a)
Supplement: RA-014-D4RA01859A-s003 [file RA-014-D4RA01859A-s003.xlsx]

## Sheet: README
Label	Description
MOF_name	refcode used in CSD and CoRE MOF databases
# atoms	ID used in QMOF database
reduced_formula	number of atoms in the unit cell
# strech types (instances)	number of stretch types (number of stretch instances)
# bend types (instances)	number of bend types (number of bend instances)
# non_rot torsion types (instances)	number of non-rotatable torsion types (number of non-rotatable torsion instances)
# hindered torsion types (instances)	number of hindered torsion types (number of hindered torsion instances)
# rot torsion types (instances)	number of rotatable torsion types (number of rotatable torsion instances)
# ADDT non-rot/hind	number of non-rotatable/hindered dihedral instances identified as having angle-damped dihedral torsion
# CADT non-rot/hind	number of non-rotatable/hindered dihedral instances identified as having constant amplitude dihedral torsion
# ADDT rot	number of rotatable dihedral instances identified as having angle-damped dihedral torsion
# CADT rot	number of rotatable dihedral instances identified as having constant amplitude dihedral torsion
# ADDT linear	number of dihedral instances identified as having angle-damped dihedral torsion with linear bond angle
R2	R-squared
RMSE	root mean squared error
ind	individual equilibrium values
avg	average equilibrium values
wc	with considering bond-bond cross terms
woc	without considering bond-bond cross terms
forces_training	using forces training dataset
dihedral_training	using rotatable dihedral training dataset
AP	using dihedral pruning
BP	not using dihedral pruning
lambda0	in LASSO method, extracting the model parameters by using λ -> 0
lambda_best	in LASSO method, extracting the model parameters by using λ = λ_best
validation	using validation dataset
TA	total attempted
Examples
#k's bond_stretch_TA_avg	number of total attempted k's for bond stretches when using average equilibrium values
#k's bond_stretch_lambda0_avg	number of k's for bond stretches when using average equilibrium values when extracting the model parameters by using λ -> 0 in LASSO method
#k's bond_stretch_lambda_best_avg	number of k's for bond stretches when using average equilibrium values when extracting the model parameters by using λ = λ _best in LASSO method
R2_AP_ind_forces_training_wc_lambda0	R-squared value using input files with considering dihedral pruning step and using individual equilibrium values for forces training dataset by considering bond-bond cross terms and extracting the model parameters by using λ -> 0 in LASSO method
RMSE_avg_dihedral_training_woc_lambda_best	Root mean square value using average equilibrium values for rotatable dihedral training dataset without considering bond-bond cross terms and extracting the model parameters by using λ -> λ_best in LASSO method (if we didn't specify AP/BP, default: AP (using dihedral pruning))
R2_ind_validation_woc	R-squared value using individual equilibrium values for validation dataset without considering bond-bond cross terms (for all validation parts, we used the model parameters extracted from λ = λ _best in LASSO method)(default: AP (using dihedral pruning))

## Sheet: MOFs_info
MOF_name	qmof_id	# atoms	reduced_formula	# strech types (instances)	# bend types (instances)	# non_rot torsion types (instances)	# hindered torsion types (instances)	# rot torsion types (instances)	# ADDT non-rot/hind	# CADT non-rot/hind	# ADDT rot	# CADT rot	# ADDT Linear
Info for MOFs in Q1 (with no rotatable dihedrals, with no hindered dihedrals)
AFITEP	qmof-7d89f40	98	ZnC26H16N2O4	17 (108)	39 (176)	27 (100)	0	0	8	119	0	0	0
AMOYOR	qmof-9964e9d	122	ZnC30H24N2O4	18 (132)	49 (220)	24 (92)	0	0	0	118	0	0	0
ARAKAH	qmof-e6c9e36	312	ZnC20H12N2O4	22 (352)	65 (592)	30 (240)	0	0	0	274	0	0	0
ARIBOS	qmof-4a1e9e7	156	CdC20H13NO4	22 (180)	62 (328)	37 (160)	0	0	14	170	0	0	0
ATOBIW	qmof-56ad7f4	424	ZnC25H17N5O5	28 (472)	79 (776)	45 (400)	0	0	24	404	0	0	0
BOMCOX	qmof-d38b97e	328	ZnC20H13N2O5	24 (364)	86 (592)	80 (388)	0	0	24	422	0	0	0
BUSQIQ	qmof-9af4bae	40	Al2C5H5O8	13 (60)	47 (174)	18 (58)	0	0	8	64	0	0	0
BUVWOF03	qmof-c861c48	306	FeC24H16N10	24 (360)	51 (654)	47 (456)	0	0	14	518	0	0	0
BUVYIB	qmof-a8ea913	153	FeC24H16N10	24 (180)	54 (327)	45 (210)	0	0	23	217	0	0	0
COMDOY	qmof-df82873	38	GaC8H5O5	8 (46)	16 (92)	6 (44)	0	0	21	34	0	0	0
DIXJIF	qmof-44dcbfb	248	ZnC15H10NO4	21 (284)	57 (496)	26 (204)	0	0	16	210	0	0	0
DONNEA	qmof-071a36b	38	GaC8H5O5	8 (46)	21 (92)	8 (36)	0	0	10	39	0	0	0
DONNIE	qmof-33a1180	72	GaC8H4O5	7 (88)	15 (176)	6 (88)	0	0	43	62	0	0	0
EBEMII	qmof-150491a	156	CdC18H12N4O4	24 (180)	60 (304)	47 (172)	0	0	14	184	0	0	0
EBOBIJ	qmof-55781e8	140	ZnC16H12N2O4	15 (152)	31 (248)	14 (112)	0	0	0	123	0	0	0
EBOBUV	qmof-2323e49	156	ZnC18H14N2O4	17 (168)	30 (272)	16 (136)	0	0	0	147	0	0	0
EKEHUZ	qmof-15fda22	96	ZnC3H7NO3P	7 (111)	28 (234)	17 (108)	0	0	38	90	0	0	0
EMIVAY	qmof-15271a7	224	ZnC24H20N4O6S	29 (248)	73 (440)	33 (176)	0	0	0	214	0	0	0
EMOFIX	qmof-a5a2ea2	204	ZnC20H21N4O5	30 (222)	87 (396)	33 (130)	0	0	4	153	0	0	0
ESEDAJ	qmof-ce87519	248	ZnC17H9O4	12 (288)	41 (488)	30 (280)	0	0	28	296	0	0	0
FIPWOS	qmof-86c4ff7	58	ZnC9H12N4O3	28 (64)	59 (122)	18 (36)	0	0	0	45	0	0	0
FIPXEJ	qmof-8469b3a	116	ZnC9H12N4O3	31 (128)	114 (244)	37 (76)	0	0	9	79	0	0	0
FUBNOH	qmof-2b54192	144	ZnC19H11NO4	16 (168)	35 (296)	17 (144)	0	0	10	162	0	0	0
FURFOP	qmof-0ab5c05	168	ZnC16H16N4O4S	24 (184)	99 (324)	69 (180)	0	0	10	191	0	0	0
GUYLOC	qmof-5ce2533	248	ZnC15H8NO4S2	18 (292)	55 (511)	30 (235)	0	0	28	237	0	0	0
GUYLUI	qmof-535c7b9	248	ZnC15H8NO4S2	19 (292)	54 (512)	30 (244)	0	0	32	234	0	0	0
HECQUB	qmof-dbfac13	376	ZnC18H12N14O2	15 (448)	29 (808)	12 (384)	0	0	51	306	0	0	64
HIFTOG02	qmof-84773bf	212	Zn4C24H12O13	7 (256)	22 (456)	36 (502)	0	0	172	402	0	0	0
HIFVUO	qmof-2b65e1f	272	ZnC6H6N4	6 (320)	23 (576)	35 (568)	0	0	0	630	0	0	0
HOZDOR	qmof-444e62d	58	Al2C9H6O9P3	11 (72)	51 (140)	33 (72)	0	0	48	42	0	0	0
IBOCIO	qmof-d9d32cd	116	Zn3C18H18N7O9P3	22 (138)	102 (258)	56 (122)	0	0	24	124	0	0	0
KEWZOD	qmof-ac6a77a	148	ZnC19H11N2O4	19 (170)	45 (296)	27 (172)	0	0	20	164	0	0	8
KINDIW	qmof-bcd71bd	94	ErC24H14N2O6	23 (120)	83 (224)	37 (82)	0	0	12	103	0	0	0
KURSOH	qmof-3983644	168	ZnC20H12N5O4	24 (188)	59 (304)	37 (160)	0	0	0	196	0	0	0
LALYOO	qmof-ab51834	342	CdC7ClH6NO2S	17 (450)	49 (864)	36 (474)	0	0	202	373	0	0	0
LIWXIZ	qmof-cacb6b5	132	Zn2C31H20N4O9	32 (150)	112 (258)	55 (116)	0	0	17	126	0	0	0
LODPOL	qmof-99cc81d	172	ZnC20H14N4O4	21 (192)	60 (320)	36 (160)	0	0	4	192	0	0	0
LOJLAZ	qmof-a5e17b9	148	Au2FeC16H8N10	13 (172)	30 (300)	16 (176)	0	0	56	148	0	0	0
LUFCAS	qmof-d2b445f	164	CdC18H12N6O4	18 (192)	41 (348)	19 (160)	0	0	0	180	0	0	0
MADVUJ	qmof-5c1c773	144	CuC16H16IS2	8 (160)	31 (292)	14 (112)	0	0	0	138	0	0	0
MADWAQ	qmof-9f9d39c	144	CuBrC16H16S2	8 (160)	32 (292)	21 (152)	0	0	0	185	0	0	0
MAZSUD	qmof-d078b33	49	Zn3C20H12N6O8	19 (60)	46 (111)	28 (65)	0	0	10	72	0	0	0
MEKDUC	qmof-b0186a3	132	CdC14H8N6O2S2	20 (152)	49 (252)	33 (148)	0	0	9	165	0	0	0
MIBQAR01	qmof-a2d95c3	424	Zn4C24H12O13	7 (512)	11 (912)	6 (528)	0	0	192	360	0	0	0
MIZKOW	qmof-ee8c30a	136	CuLaC14H8N2O8	22 (164)	81 (340)	36 (136)	0	0	42	128	0	0	0
MOPFOO	qmof-fb859e4	208	ZnC4H3N3O2	13 (248)	27 (448)	12 (184)	0	0	36	184	0	0	0
MUGQAI	qmof-5d60ff1	256	CuC7H4N4	22 (312)	63 (548)	33 (256)	0	0	10	293	0	0	0
NEKREB	qmof-0c2ac6d	252	PdC8H6N4O2	7 (288)	13 (504)	4 (192)	0	0	0	204	0	0	0
NOMQAJ01	qmof-64b5161	144	ZnC19H11NO4	19 (164)	45 (276)	35 (176)	0	0	0	206	0	0	0
OGIBUD	qmof-d73c071	84	ZnC10H2O8	12 (96)	42 (160)	23 (83)	0	0	8	85	0	0	0
OJIWIO	qmof-1a77da5	156	ZnC20H10N2O6	22 (182)	58 (320)	38 (168)	0	0	0	222	0	0	0
OPOBIF	qmof-c58a47b	210	Zn2C13H10N6O4	27 (246)	73 (444)	67 (286)	0	0	58	272	0	0	0
OVICUS	qmof-53872ef	108	ZnC12H6N2O4S2	22 (128)	54 (224)	26 (104)	0	0	20	114	0	0	0
PEYPIU	qmof-19aee6c	120	ZnC14H8NO6	19 (142)	78 (256)	62 (140)	0	0	0	158	0	0	0
PIXHUB	qmof-a155c71	110	ZnC28H20N2O4	20 (128)	77 (220)	49 (116)	0	0	0	154	0	0	0
PORVUO	qmof-a51b2a6	102	ZnC26H18N2O4	17 (112)	43 (184)	26 (92)	0	0	0	118	0	0	0
POSFOU	qmof-3406a31	172	CdC20H14N4O4	18 (192)	40 (320)	16 (128)	0	0	8	137	0	0	0
QIVYUR	qmof-afcfed2	156	ZnC18H14N2O4	17 (168)	33 (272)	14 (104)	0	0	0	127	0	0	0
QIWCUW	qmof-d865c0c	344	ZnC21H13N4O4	29 (396)	66 (680)	42 (364)	0	0	12	395	0	0	0
QOKCID	qmof-9e38c97	100	ZnC12H7O5	18 (116)	49 (200)	22 (88)	0	0	18	87	0	0	0
QOTBAE	qmof-cc59fa2	256	ZnC6H4N3O2	14 (304)	30 (544)	14 (224)	0	0	0	276	0	0	0
QUPHUF	qmof-05fa79c	182	Zn2C41H32N4O12	18 (200)	70 (340)	44 (156)	0	0	0	186	0	0	0
QURSEC	qmof-314b14f	216	PdZnC24H16N4O8	11 (240)	42 (400)	20 (160)	0	0	0	183	0	0	0
REDROI	qmof-3a743a9	122	Zn5C24H16O16	19 (160)	63 (310)	32 (136)	0	0	16	144	0	0	0
REYBAA	qmof-728c062	188	ZnC22H15N4O5	26 (208)	66 (344)	41 (188)	0	0	0	222	0	0	0
SOCLAZ	qmof-981d15e	156	CdC19H13N2O4	32 (174)	72 (296)	31 (130)	0	0	0	162	0	0	0
SOWCOY01	qmof-713e069	92	ZnC10H5N3O4	18 (112)	41 (204)	28 (120)	0	0	20	116	0	0	0
TUBLIN	qmof-fb9251e	130	CdC32H24N2O6	29 (144)	89 (246)	50 (110)	0	0	2	135	0	0	0
VACFUB01	qmof-3eee18d	81	ZnC12H8N2O4	10 (90)	23 (150)	14 (90)	0	0	0	112	0	0	0
WECJAR	qmof-4836169	264	ZnC16H9NO4S2	21 (308)	56 (536)	31 (252)	0	0	0	274	0	0	0
WOBHIF01	qmof-1e81b2d	162	ZnC4HO3	15 (270)	30 (522)	22 (306)	0	0	134	260	0	0	0
XAHROQ	qmof-fe43f92	88	CuC5HN4	8 (112)	21 (200)	13 (104)	0	0	32	60	0	0	32
XARCEB	qmof-08021a9	216	ZnC12H7N3O4	26 (252)	56 (448)	24 (188)	0	0	40	167	0	0	0
XEDPIH	qmof-24d1d89	112	ZnBrC5H3N4	17 (136)	52 (248)	28 (120)	0	0	20	118	0	0	0
XEXMEU	qmof-3fcf6ee	144	ZnC19H8N2O6	22 (172)	59 (308)	38 (172)	0	0	10	176	0	0	0
YARKEJ	qmof-cbc7be9	170	Zn2C40H30N4O9	26 (188)	67 (322)	34 (139)	0	0	0	159	0	0	0
YARSIV	qmof-f758424	146	Zn3C30H20N8O12	27 (182)	76 (350)	35 (140)	0	0	22	142	0	0	0
YUSGID	qmof-bd0f18d	122	Zn2C28H20N2O8S	37 (140)	102 (244)	49 (104)	0	0	21	109	0	0	0
Info for MOFs in Q2 (with no rotatable dihedrals, with at least one hindered dihedrals)
XORGUI	qmof-42d2469	84	CdC8H4N8	24 (100)	41 (164)	20 (80)	1 (4)	0 (0)	0	102	0	0	0
Info for MOFs in Q3 (with at least one rotatable dihedrals, with no hindered dihedrals)
ATOXEN	qmof-bc36f56	120	ZnC14H10NO4	21 (138)	77 (248)	54 (122)	0	2 (4)	14	114	0	4	0
BEPMEQ	qmof-a1e2a57	156	ZnC9ClH11N2O2	20 (168)	53 (312)	32 (138)	0	1 (6)	0	152	0	6	0
BEPNUH	qmof-c21278c	156	ZnBrC9H11N2O2	21 (174)	57 (342)	48 (184)	0	3 (12)	0	216	0	14	0
BEPVID	qmof-5f0dd01	104	Cu3C20H21N8	25 (114)	70 (198)	41 (85)	0	5 (12)	22	57	4	9	6
BIBBUL	qmof-b94f35d	236	ZnC24H24N6O4	29 (256)	84 (448)	41 (184)	0	2 (8)	12	196	0	8	0
BUYDEG	qmof-4d5bb8c	272	ZnC6H4N3O3	17 (320)	34 (560)	15 (256)	0	1 (16)	0	320	0	16	0
CEGDUO	qmof-918bad7	192	AgC4H5N2	11 (212)	33 (368)	17 (148)	0	2 (16)	18	148	0	16	0
CEGFAW	qmof-798695d	192	AgC4H5N2	12 (220)	45 (408)	44 (256)	0	4 (16)	46	238	0	16	0
CUQRIR	qmof-c1b5346	232	ZnC12H11N3O2	17 (260)	50 (464)	20 (164)	0	2 (16)	0	198	0	18	0
ESIFIX	qmof-bb4d5bb	342	CdC6H6N4O2	18 (414)	44 (810)	21 (324)	0	6 (72)	106	273	0	72	0
EWUGEK	qmof-4455fd4	248	CdC21H28N6O6	23 (280)	90 (572)	44 (188)	0	1 (4)	18	196	0	6	0
FOCYUT	qmof-f879f69	124	NdC34H19O8	28 (152)	91 (280)	57 (130)	0	1 (2)	30	118	0	2	0
GIRYIR	qmof-7955c68	182	Zn3C40H28N6O14	33 (204)	79 (354)	53 (184)	0	3 (8)	18	209	0	8	0
GIWMOP	qmof-e4d19f2	176	CdC8H6N5S2	23 (204)	48 (384)	20 (156)	0	1 (8)	44	123	0	8	16
GULPIN	qmof-f0ff70c	162	Zn2C39F6H22N4O8	24 (180)	66 (308)	32 (136)	0	1 (4)	0	169	0	4	0
GUMDEZ	qmof-0523aea	112	ZnC10H10N4O2S	18 (128)	50 (232)	22 (84)	0	2 (8)	27	77	0	8	0
HEBZAR	qmof-e17b289	288	ZnBrC5H3N4O2	17 (360)	40 (702)	29 (396)	0	5 (54)	106	376	0	54	0
HEBZEV	qmof-79d8511	288	ZnC5ClH3N4O2	17 (360)	38 (702)	27 (378)	0	1 (18)	148	296	0	20	0
HIHJUF	qmof-b5fe3cc	216	ZnC6H5N4O2	18 (252)	34 (444)	23 (240)	0	1 (12)	36	222	0	12	0
HOXGEH	qmof-40eecfd	228	Sn2C13H18O5	25 (252)	70 (480)	40 (164)	0	14 (54)	34	164	8	58	0
JIVFUQ	qmof-f17dd8e	46	ZnC6H6O8P2	13 (52)	23 (88)	8 (32)	0	2 (8)	16	30	0	10	0
KACZUM	qmof-c5480ba	90	ZnC20H14N4O6	23 (100)	41 (164)	17 (72)	0	1 (4)	0	90	0	4	0
KATDAM	qmof-f2d3b75	354	CdC27H21N5O5	36 (390)	100 (660)	66 (338)	0	3 (12)	17	358	0	14	0
KINJUO	qmof-9300c45	324	CdC40H30N6O4	37 (368)	105 (612)	61 (276)	0	2 (8)	0	321	0	10	0
MEJQID	qmof-cb0ed13	112	ZnC11H8N6O2	25 (128)	50 (216)	22 (88)	0	1 (4)	0	105	0	4	0
OTOZOO	qmof-74d6dbe	144	ZnC17H11N3O4	26 (168)	66 (300)	31 (128)	0	1 (4)	10	134	0	4	0
PEGBEK01	qmof-2c14e85	176	ZnC7H8N6	20 (208)	73 (400)	37 (172)	0	4 (16)	8	202	0	16	0
PITMOW	qmof-1e87041	348	Zn2C41F12H21N2O8S	35 (386)	108 (668)	67 (302)	0	5 (24)	28	314	0	28	0
PUFVUJ	qmof-59d990b	272	CdC15ClH11N4O2	33 (320)	68 (560)	24 (192)	0	1 (8)	0	216	0	8	0
QESYOD	qmof-cd020ad	264	CuC8H10IN2	11 (306)	49 (624)	74 (482)	0	9 (66)	36	514	0	66	0
SARBOE	qmof-ca94f00	124	ZnC12H10N4O4	19 (136)	49 (224)	22 (84)	0	2 (8)	12	84	0	10	0
SARBUK	qmof-b298211	496	ZnC12H10N4O4	16 (544)	28 (896)	12 (352)	0	1 (32)	32	366	0	32	0
TEPGUS	qmof-f7afbf6	120	ZnC11H9N7O2	30 (136)	57 (228)	22 (88)	0	2 (8)	0	101	0	8	0
UKALEZ	qmof-4995cf5	232	ZnC12H9N3O4	20 (272)	55 (504)	24 (200)	0	2 (16)	32	184	0	16	0
WIYFAM	qmof-dd2c786	146	Zn4C28H28N8O5	14 (172)	28 (332)	11 (108)	0	1 (16)	16	102	0	16	0
Info for MOFs in Q4 (with at least one rotatable dihedrals, with at least one hindered dihedrals)
IBICED	qmof-e8046f4	192	ZnBrC11H15N2O2	22 (210)	60 (414)	42 (174)	1 (6)	2 (12)	0	210	0	12	0
TUMDEM	qmof-d3bbe4b	136	CdC15H9N5O4	30 (168)	65 (288)	25 (104)	1 (4)	1 (4)	6	118	0	6	0

## Sheet: MOFs_statistics_Q1_Q2
MOF_name	R2_AP_ind_forces_training_wc_lambda0	RMSE_AP_ind_forces_training_wc_lambda0	R2_AP_ind_forces_training_wc_lambda_best	RMSE_AP_ind_forces_training_wc_lambda_best	R2_AP_ind_validation_wc	RMSE_AP_ind_validation_wc	R2_AP_avg_forces_training_wc_lambda0	RMSE_AP_avg_forces_training_wc_lambda0	R2_AP_avg_forces_training_wc_lambda_best	RMSE_AP_avg_forces_training_wc_lambda_best	R2_AP_avg_validation_wc	RMSE_AP_avg_validation_wc	R2_AP_ind_forces_training_woc_lambda0	RMSE_AP_ind_forces_training_woc_lambda0	R2_AP_ind_forces_training_woc_lambda_best	RMSE_AP_ind_forces_training_woc_lambda_best	R2_AP_ind_validation_woc	RMSE_AP_ind_validation_woc	R2_AP_avg_forces_training_woc_lambda0	RMSE_AP_avg_forces_training_woc_lambda0	R2_AP_avg_forces_training_woc_lambda_best	RMSE_AP_avg_forces_training_woc_lambda_best	R2_AP_avg_validation_woc	RMSE_AP_avg_validation_woc	R2_BP_ind_forces_training_lambda0	RMSE_BP_ind_forces_training_lambda0	R2_BP_ind_forces_training_lambda_best	RMSE_BP_ind_forces_training_lambda_best	R2_BP_ind_validation	RMSE_BP_ind_validation	R2_BP_avg_forces_training_lambda0	RMSE_BP_avg_forces_training_lambda0	R2_BP_avg_forces_training_lambda_best	RMSE_BP_avg_forces_training_lambda_best	R2_BP_avg_validation	RMSE_BP_avg_validation
Statistics for MOFs in Q1 (with no rotatable dihedrals, with no hindered dihedrals)
AFITEP	0.941793	0.12469	0.941793	0.12469	0.947188	0.153764	0.9385	0.128169	0.938481	0.128189	0.945261	0.156544	0.927532	0.13913	0.927532	0.13913	0.931266	0.175418	0.925012	0.141528	0.925012	0.141528	0.929969	0.177064	0.942905	0.123494	0.942834	0.12357	0.949086	0.150975	0.940301	0.126278	0.940252	0.12633	0.947634	0.153112
AMOYOR	0.936007	0.119385	0.935917	0.119469	0.936977	0.166249	0.929134	0.125633	0.928954	0.125793	0.933378	0.17093	0.923858	0.130226	0.923792	0.130282	0.924903	0.181477	0.917996	0.135146	0.917996	0.135146	0.921958	0.185002	0.948145	0.107469	0.948145	0.107469	0.955435	0.1398	0.942305	0.113358	0.942305	0.113358	0.952442	0.144418
ARAKAH	0.925382	0.0963968	0.925382	0.0963968	0.925411	0.18248	0.912493	0.104391	0.912485	0.104396	0.921365	0.187363	0.909635	0.106082	0.909635	0.106082	0.908563	0.202041	0.899544	0.111848	0.899544	0.111848	0.905879	0.204985	0.939006	0.0871538	0.939006	0.0871538	0.946974	0.153858	0.928887	0.0941055	0.92887	0.0941169	0.944271	0.157731
ARIBOS	0.93367	0.113937	0.933662	0.113944	0.934337	0.169429	0.927312	0.119273	0.927175	0.119386	0.93125	0.173366	0.918222	0.126511	0.918222	0.126511	0.917762	0.189611	0.911953	0.131271	0.911953	0.131271	0.915321	0.192405	0.942632	0.105961	0.942542	0.106045	0.947148	0.152005	0.936395	0.111572	0.936234	0.111714	0.944673	0.155523
ATOBIW	0.93213	0.0817836	0.932112	0.0817946	0.93103	0.177175	0.905156	0.0966793	0.905091	0.0967124	0.9224	0.187933	0.917722	0.0900469	0.917722	0.0900469	0.915605	0.195987	0.89267	0.102846	0.89267	0.102846	0.908964	0.203553	0.940717	0.0764351	0.940717	0.0764351	0.945804	0.157055	0.915681	0.0911569	0.915681	0.0911569	0.939184	0.166372
BOMCOX	0.930964	0.0888824	0.93092	0.0889106	0.933558	0.171101	0.898054	0.10801	0.898054	0.10801	0.919279	0.188592	0.915616	0.0982671	0.915596	0.0982788	0.917769	0.190348	0.881664	0.116369	0.881664	0.116369	0.904821	0.204786	0.935476	0.0859286	0.935476	0.0859286	0.94119	0.160974	0.90155	0.106142	0.901542	0.106146	0.928308	0.177731
BUSQIQ	0.914077	0.175036	0.911452	0.17769	0.906879	0.191984	0.911868	0.177272	0.909264	0.179872	0.904031	0.194898	0.888197	0.199664	0.888197	0.199664	0.878122	0.219637	0.887017	0.200715	0.887017	0.200715	0.876253	0.221314	0.904587	0.18445	0.904587	0.18445	0.903863	0.195068	0.903405	0.185588	0.903396	0.185596	0.901979	0.19697
BUVWOF03	0.946017	0.0827765	0.946017	0.0827765	0.950079	0.152222	0.942408	0.0854989	0.942391	0.085512	0.949117	0.153682	0.928876	0.0950141	0.928876	0.0950141	0.93205	0.177595	0.925342	0.0973459	0.925342	0.0973459	0.931126	0.178798	0.942816	0.0851956	0.942816	0.0851956	0.949148	0.153635	0.939232	0.0878251	0.939232	0.0878251	0.948152	0.155132
BUVYIB	0.945055	0.108412	0.945055	0.108412	0.946282	0.157773	0.941823	0.111554	0.941823	0.111554	0.944548	0.1603	0.927961	0.124136	0.927961	0.124136	0.928702	0.181766	0.925075	0.126598	0.925075	0.126598	0.927215	0.183652	0.943752	0.109689	0.943646	0.109793	0.950537	0.151395	0.940873	0.112462	0.940864	0.11247	0.949217	0.153402
COMDOY	0.895626	0.201258	0.895626	0.201258	0.888678	0.213915	0.895617	0.201267	0.895617	0.201267	0.888676	0.213916	0.875302	0.219982	0.875302	0.219982	0.866527	0.234232	0.87529	0.219993	0.87529	0.219993	0.866528	0.234231	0.905888	0.191109	0.905599	0.191402	0.90069	0.202045	0.905875	0.191121	0.905587	0.191414	0.900689	0.202045
DIXJIF	0.92615	0.103562	0.92615	0.103562	0.918479	0.188353	0.91264	0.112636	0.91264	0.112636	0.912715	0.194898	0.910099	0.114263	0.910099	0.114263	0.900378	0.208218	0.896461	0.122624	0.896461	0.122624	0.895686	0.213064	0.940569	0.0929029	0.94056	0.0929096	0.940865	0.160421	0.927051	0.102928	0.927051	0.102928	0.936366	0.166411
DONNEA	0.907626	0.190059	0.907626	0.190059	0.901729	0.207705	0.906066	0.191657	0.905824	0.191904	0.900522	0.208977	0.888407	0.208897	0.888379	0.208923	0.879311	0.23018	0.88759	0.20966	0.887529	0.209717	0.878569	0.230887	0.915029	0.182284	0.915029	0.182284	0.912048	0.196498	0.91429	0.183075	0.91429	0.183075	0.91143	0.197187
DONNIE	0.91601	0.159288	0.91584	0.15945	0.910766	0.191602	0.916016	0.159282	0.915846	0.159444	0.910762	0.191607	0.895558	0.177626	0.895513	0.177665	0.887332	0.215296	0.895566	0.177619	0.895521	0.177658	0.887329	0.215299	0.915597	0.159679	0.915597	0.159679	0.912898	0.1893	0.915605	0.159671	0.915605	0.159671	0.912895	0.189303
EBEMII	0.931231	0.118372	0.931231	0.118372	0.935261	0.166206	0.926031	0.122766	0.926031	0.122766	0.93282	0.16931	0.913882	0.132465	0.913882	0.132465	0.9183	0.186713	0.909007	0.136163	0.909007	0.136163	0.91591	0.189424	0.933358	0.116527	0.933341	0.116542	0.942821	0.156201	0.928492	0.120707	0.928376	0.120804	0.940425	0.15944
EBOBIJ	0.926725	0.12418	0.926725	0.12418	0.923927	0.17736	0.920979	0.128957	0.920962	0.12897	0.92103	0.180706	0.912685	0.135556	0.912685	0.135556	0.908606	0.194402	0.90831	0.13891	0.90831	0.13891	0.906323	0.196815	0.937378	0.114799	0.937261	0.114906	0.942708	0.153918	0.933092	0.118662	0.933092	0.118662	0.940636	0.156676
EBOBUV	0.927411	0.117871	0.927242	0.118008	0.926152	0.176019	0.923839	0.120736	0.923839	0.120736	0.92464	0.177811	0.914458	0.127956	0.914423	0.127982	0.909854	0.194475	0.910607	0.130805	0.910554	0.130844	0.908325	0.196117	0.938292	0.108678	0.938292	0.108678	0.938053	0.161212	0.934482	0.111983	0.934482	0.111983	0.936505	0.163215
EKEHUZ	0.942927	0.107487	0.942862	0.107548	0.94099	0.140012	0.928218	0.120544	0.928096	0.120647	0.933269	0.148891	0.936388	0.113477	0.936388	0.113477	0.934001	0.148072	0.919116	0.127959	0.919086	0.127983	0.925946	0.156848	0.93722	0.112733	0.93722	0.112733	0.93533	0.146573	0.920069	0.127203	0.92006	0.12721	0.92746	0.155236
EMIVAY	0.941132	0.0956672	0.94104	0.095742	0.942998	0.155149	0.936561	0.0993122	0.936402	0.0994364	0.940969	0.157886	0.930301	0.104097	0.930301	0.104097	0.930926	0.170788	0.925926	0.107314	0.925926	0.107314	0.929057	0.173084	0.943477	0.0937427	0.943477	0.0937427	0.948202	0.147896	0.939151	0.097264	0.939151	0.097264	0.946424	0.150413
EMOFIX	0.928775	0.104322	0.928453	0.104557	0.929845	0.171823	0.921223	0.109714	0.921094	0.109803	0.927086	0.175169	0.918065	0.111891	0.918065	0.111891	0.91859	0.185093	0.911692	0.116161	0.911692	0.116161	0.916433	0.187529	0.940209	0.0955825	0.940209	0.0955825	0.946391	0.150199	0.933897	0.100501	0.933631	0.100703	0.944108	0.153364
ESEDAJ	0.936783	0.0965526	0.936783	0.0965526	0.931842	0.171468	0.90678	0.117247	0.90678	0.117247	0.919332	0.186543	0.921073	0.107885	0.921073	0.107885	0.91529	0.191159	0.891509	0.126486	0.891509	0.126486	0.904014	0.203484	0.940678	0.0935311	0.940678	0.0935311	0.942587	0.157374	0.911078	0.114512	0.911078	0.114512	0.931168	0.172315
FIPWOS	0.933306	0.144769	0.933306	0.144769	0.931537	0.161868	0.932649	0.145481	0.932649	0.145481	0.930983	0.162521	0.923082	0.15547	0.923082	0.15547	0.920805	0.174093	0.92245	0.156107	0.92245	0.156107	0.920275	0.174674	0.931839	0.146353	0.931444	0.146776	0.932704	0.160483	0.93111	0.147133	0.930803	0.14746	0.932078	0.161227
FIPXEJ	0.935396	0.120071	0.935232	0.120224	0.939678	0.161744	0.919202	0.13428	0.914793	0.137895	0.926041	0.179096	0.925698	0.128769	0.925698	0.128769	0.93019	0.173999	0.911082	0.140866	0.911082	0.140866	0.922487	0.183348	0.935072	0.120372	0.934463	0.120935	0.939277	0.162281	0.920476	0.133217	0.920307	0.133359	0.931832	0.171941
FUBNOH	0.92979	0.124734	0.929745	0.124774	0.93028	0.17881	0.927812	0.126478	0.927812	0.126478	0.929365	0.179979	0.912424	0.139309	0.912424	0.139309	0.910344	0.20277	0.910897	0.140518	0.910897	0.140518	0.909637	0.203567	0.938116	0.117104	0.938116	0.117104	0.94211	0.162936	0.936581	0.118549	0.936581	0.118549	0.941376	0.163965
FURFOP	0.943269	0.101207	0.943249	0.101225	0.946935	0.147806	0.925606	0.115896	0.925289	0.116143	0.937356	0.160594	0.931168	0.111479	0.931069	0.11156	0.935264	0.163253	0.916355	0.122891	0.916285	0.122943	0.928414	0.171673	0.937383	0.106328	0.937339	0.106365	0.941443	0.155267	0.922548	0.118254	0.920919	0.119491	0.932779	0.166357
GUYLOC	0.928915	0.0989732	0.928915	0.0989732	0.92907	0.174462	0.924042	0.10231	0.924042	0.10231	0.927022	0.176962	0.91146	0.110458	0.91146	0.110458	0.910811	0.195632	0.907133	0.113125	0.907133	0.113125	0.909142	0.197454	0.935006	0.0946378	0.935006	0.0946378	0.939797	0.160729	0.930589	0.0978008	0.930589	0.0978008	0.938023	0.163079
GUYLUI	0.929291	0.0993046	0.929291	0.0993046	0.923356	0.176765	0.906492	0.114197	0.906485	0.114202	0.914437	0.186767	0.910956	0.111438	0.910956	0.111438	0.903355	0.198494	0.886343	0.125901	0.886343	0.125901	0.894831	0.207063	0.934252	0.0957578	0.934252	0.0957578	0.93465	0.163222	0.909617	0.112273	0.909574	0.1123	0.926003	0.173686
HECQUB	0.91982	0.0970104	0.91982	0.0970104	0.920246	0.195427	0.91982	0.0970103	0.91982	0.0970103	0.920246	0.195427	0.900747	0.107933	0.900714	0.107952	0.899743	0.219112	0.900747	0.107933	0.900714	0.107952	0.899742	0.219113	0.918941	0.0975404	0.918941	0.0975404	0.923788	0.191039	0.918941	0.0975404	0.918941	0.0975404	0.923787	0.191039
HIFTOG02	0.931109	0.104286	0.931109	0.104286	0.938581	0.16286	0.928332	0.106366	0.928332	0.106366	0.937343	0.164495	0.913013	0.117184	0.912982	0.117206	0.91911	0.186901	0.910441	0.118904	0.910441	0.118904	0.918014	0.188164	0.922331	0.110731	0.922331	0.110731	0.928918	0.175205	0.919678	0.112606	0.919678	0.112606	0.927801	0.176576
HIFVUO	0.953965	0.0777737	0.953965	0.0777737	0.960315	0.130835	0.94898	0.0818768	0.948961	0.0818922	0.958419	0.133924	0.940681	0.0882854	0.940681	0.0882854	0.946745	0.151564	0.934582	0.0927124	0.934582	0.0927124	0.944679	0.154475	0.941199	0.0878991	0.941199	0.0878991	0.947472	0.150526	0.935121	0.0923303	0.935121	0.0923303	0.945401	0.153464
HOZDOR	0.937237	0.139767	0.937065	0.139958	0.936505	0.166902	0.901602	0.175003	0.900911	0.175616	0.906025	0.203047	0.922439	0.155372	0.922007	0.155804	0.918094	0.18956	0.889681	0.185301	0.889251	0.185662	0.891933	0.217739	0.931103	0.146438	0.931103	0.146438	0.929514	0.175849	0.898496	0.177743	0.898327	0.177892	0.903028	0.206259
IBOCIO	0.934574	0.119155	0.93415	0.11954	0.936014	0.161543	0.911866	0.138295	0.911061	0.138926	0.923019	0.17719	0.922438	0.129736	0.922315	0.129839	0.924358	0.175642	0.900283	0.147103	0.900163	0.147192	0.91236	0.18906	0.936388	0.117491	0.935667	0.118155	0.938722	0.158089	0.91417	0.136476	0.91334	0.137135	0.92652	0.173114
KEWZOD	0.93847	0.116175	0.93847	0.116175	0.937368	0.164759	0.935483	0.118962	0.935483	0.118962	0.935519	0.167173	0.922015	0.13079	0.921982	0.130818	0.920145	0.186039	0.919535	0.132853	0.919535	0.132853	0.918696	0.187718	0.937298	0.117276	0.937298	0.117276	0.942148	0.158347	0.93487	0.119525	0.934862	0.119533	0.940772	0.160219
KINDIW	0.930705	0.138475	0.930199	0.13898	0.928255	0.177773	0.914939	0.153422	0.91254	0.15557	0.914348	0.194239	0.914773	0.153571	0.914773	0.153571	0.910696	0.198337	0.90061	0.165842	0.900601	0.165849	0.900072	0.209803	0.936556	0.132501	0.936104	0.132972	0.938064	0.165174	0.922735	0.146222	0.922527	0.14642	0.928262	0.177764
KURSOH	0.927083	0.117303	0.927083	0.117303	0.930854	0.177932	0.912732	0.128329	0.912369	0.128595	0.924554	0.185861	0.908105	0.131686	0.908105	0.131686	0.910649	0.202264	0.895256	0.140591	0.895256	0.140591	0.906015	0.207443	0.930585	0.114452	0.930585	0.114452	0.938187	0.168233	0.917804	0.124543	0.917743	0.124589	0.933566	0.174408
LALYOO	0.930781	0.0815174	0.930781	0.0815174	0.933296	0.159402	0.912383	0.0917135	0.912383	0.0917135	0.92808	0.165517	0.898585	0.0986709	0.898576	0.0986752	0.893907	0.20103	0.882919	0.106018	0.882919	0.106018	0.890193	0.204519	0.91757	0.0889572	0.91757	0.0889572	0.919491	0.175122	0.902089	0.0969514	0.902089	0.0969514	0.915997	0.178881
LIWXIZ	0.926662	0.127843	0.926525	0.127963	0.928461	0.176835	0.912096	0.139964	0.908298	0.142956	0.915467	0.192225	0.913122	0.139145	0.913104	0.13916	0.911836	0.196309	0.900796	0.148688	0.900705	0.148757	0.905645	0.203085	0.937221	0.118283	0.937124	0.118374	0.938073	0.164526	0.924944	0.129332	0.924912	0.12936	0.932095	0.172285
LODPOL	0.935835	0.111843	0.935815	0.111859	0.931161	0.173181	0.918352	0.126162	0.918267	0.126228	0.922117	0.184207	0.922889	0.122607	0.922889	0.122607	0.91693	0.190242	0.907815	0.134056	0.907784	0.134079	0.909551	0.198512	0.941079	0.107174	0.941079	0.107174	0.942898	0.157729	0.926041	0.120075	0.92599	0.120116	0.935502	0.167633
LOJLAZ	0.930703	0.128282	0.930703	0.128282	0.942916	0.162296	0.929621	0.12928	0.929621	0.12928	0.94245	0.162957	0.913425	0.143385	0.913425	0.143385	0.923627	0.187724	0.912469	0.144175	0.912469	0.144175	0.923216	0.188228	0.933809	0.125374	0.933809	0.125374	0.948695	0.153861	0.932853	0.126276	0.932853	0.126276	0.948292	0.154464
LUFCAS	0.926711	0.121703	0.926646	0.121757	0.917669	0.190606	0.924711	0.123353	0.924647	0.123405	0.916799	0.19161	0.91046	0.134522	0.91046	0.134522	0.899118	0.21099	0.908783	0.135775	0.908783	0.135775	0.898329	0.211814	0.935279	0.114369	0.935279	0.114369	0.937724	0.165774	0.933584	0.115857	0.933584	0.115857	0.93683	0.166959
MADVUJ	0.942447	0.0980097	0.942447	0.0980097	0.942889	0.146211	0.928675	0.109108	0.928675	0.109108	0.936069	0.154695	0.931051	0.107275	0.931051	0.107275	0.931576	0.160039	0.918951	0.116308	0.918951	0.116308	0.925562	0.166924	0.95162	0.0898605	0.95162	0.0898605	0.956461	0.127661	0.939567	0.100432	0.939567	0.100432	0.950316	0.136374
MADWAQ	0.948753	0.0938239	0.948745	0.0938313	0.945204	0.140091	0.934359	0.106185	0.934359	0.106185	0.937092	0.150102	0.936863	0.10414	0.936843	0.104157	0.93429	0.153409	0.924167	0.114132	0.924167	0.114132	0.927397	0.161254	0.952176	0.0906358	0.952176	0.0906358	0.956072	0.125432	0.939345	0.102073	0.939345	0.102073	0.949245	0.134826
MAZSUD	0.931697	0.161592	0.930984	0.162434	0.92163	0.184345	0.930782	0.162672	0.928087	0.165808	0.918304	0.188215	0.916122	0.179071	0.916122	0.179071	0.902856	0.205241	0.915571	0.179658	0.915571	0.179658	0.902155	0.20598	0.930582	0.162906	0.930573	0.162916	0.923299	0.182371	0.930027	0.163556	0.930027	0.163556	0.922655	0.183136
MEKDUC	0.931268	0.120488	0.931268	0.120488	0.930329	0.175034	0.924131	0.126589	0.923697	0.126951	0.926204	0.18014	0.909162	0.138515	0.909162	0.138515	0.909259	0.199755	0.902039	0.143844	0.901954	0.143907	0.905567	0.203778	0.924205	0.126527	0.923843	0.126829	0.928318	0.177542	0.917094	0.13233	0.917086	0.132336	0.924949	0.181666
MIBQAR01	0.925157	0.0836213	0.925157	0.0836213	0.918399	0.18435	0.925157	0.0836212	0.925157	0.0836212	0.918397	0.184352	0.906577	0.0934263	0.906577	0.0934263	0.898147	0.20596	0.906577	0.093426	0.906577	0.093426	0.898145	0.205961	0.928643	0.0816508	0.928643	0.0816508	0.924821	0.176947	0.928643	0.0816505	0.928643	0.0816505	0.924819	0.176949
MIZKOW	0.916595	0.13412	0.916587	0.134126	0.911006	0.194077	0.890481	0.153689	0.89005	0.153991	0.895593	0.210213	0.895282	0.150282	0.895148	0.150379	0.887817	0.2179	0.873502	0.165173	0.873286	0.165314	0.876458	0.228666	0.922947	0.128912	0.922947	0.128912	0.925096	0.178052	0.90152	0.145737	0.90152	0.145737	0.91407	0.190707
MOPFOO	0.910135	0.119576	0.910135	0.119576	0.912551	0.196124	0.909131	0.120241	0.909131	0.120241	0.912253	0.196458	0.889825	0.1324	0.889807	0.132411	0.891123	0.218837	0.888816	0.133005	0.888816	0.133005	0.890837	0.219124	0.911663	0.118555	0.911663	0.118555	0.917446	0.190556	0.910639	0.119239	0.910639	0.119239	0.917125	0.190926
MUGQAI	0.929405	0.0998898	0.929405	0.0998898	0.928835	0.178064	0.915496	0.109289	0.915467	0.109307	0.923639	0.18445	0.91103	0.112139	0.91103	0.112139	0.909677	0.200606	0.899814	0.118998	0.899814	0.118998	0.906008	0.20464	0.936604	0.0946597	0.936559	0.0946937	0.941444	0.161522	0.925394	0.102689	0.925306	0.102749	0.937742	0.166548
NEKREB	0.929213	0.102296	0.929213	0.102296	0.932018	0.174263	0.929213	0.102296	0.929213	0.102296	0.932018	0.174264	0.910099	0.115283	0.910099	0.115283	0.912438	0.197773	0.910099	0.115283	0.910099	0.115283	0.912438	0.197774	0.930289	0.101516	0.930289	0.101516	0.938212	0.166135	0.930289	0.101516	0.930289	0.101516	0.938212	0.166136
NOMQAJ01	0.93123	0.120085	0.93123	0.120085	0.931245	0.173961	0.929417	0.121658	0.929417	0.121658	0.93031	0.175141	0.914937	0.133554	0.914937	0.133554	0.912628	0.196104	0.913175	0.134931	0.913175	0.134931	0.911763	0.197073	0.937861	0.114149	0.93784	0.114168	0.940127	0.162337	0.936133	0.115725	0.936133	0.115725	0.939285	0.163474
OGIBUD	0.879134	0.182561	0.878943	0.182705	0.876717	0.229974	0.833109	0.214522	0.833004	0.21459	0.85043	0.253309	0.851621	0.202275	0.851621	0.202275	0.852008	0.251969	0.816334	0.225046	0.815969	0.225269	0.833233	0.267475	0.873382	0.186855	0.873382	0.186855	0.877999	0.228776	0.83736	0.211773	0.83709	0.211948	0.858471	0.246406
OJIWIO	0.933173	0.118855	0.933056	0.118959	0.931262	0.178364	0.910639	0.13744	0.91063	0.137447	0.919683	0.192802	0.914919	0.134108	0.914919	0.134108	0.910327	0.203723	0.896591	0.147849	0.896499	0.147915	0.90233	0.212613	0.938096	0.114393	0.938065	0.114421	0.940483	0.16597	0.919901	0.130123	0.919761	0.130236	0.932515	0.176732
OPOBIF	0.918611	0.113285	0.918611	0.113285	0.920014	0.183482	0.904892	0.122462	0.904789	0.122528	0.914525	0.189674	0.901193	0.12482	0.900889	0.125012	0.899122	0.206055	0.887385	0.133257	0.887164	0.133387	0.893783	0.211438	0.922793	0.110337	0.922668	0.110426	0.924599	0.178146	0.909062	0.119747	0.909018	0.119776	0.919442	0.184137
OVICUS	0.922531	0.136876	0.922531	0.136876	0.921538	0.182524	0.913892	0.144306	0.913892	0.144306	0.917556	0.187099	0.902293	0.153718	0.902293	0.153718	0.899153	0.20693	0.894989	0.15936	0.894989	0.15936	0.896219	0.209919	0.928438	0.131554	0.928438	0.131554	0.93109	0.171054	0.921134	0.138104	0.921134	0.138104	0.928022	0.17482
PEYPIU	0.92769	0.130037	0.92769	0.130037	0.931678	0.177851	0.910051	0.145033	0.910051	0.145033	0.923077	0.188715	0.908935	0.14593	0.908871	0.145981	0.913298	0.200352	0.892405	0.158623	0.892389	0.158634	0.906138	0.20846	0.928609	0.129208	0.928427	0.129373	0.937011	0.17077	0.912323	0.14319	0.91215	0.14333	0.929993	0.180032
PIXHUB	0.940124	0.122257	0.940124	0.122257	0.936629	0.163687	0.929571	0.132594	0.928631	0.133476	0.928909	0.173371	0.926804	0.135173	0.926804	0.135173	0.921577	0.182091	0.91697	0.143968	0.916918	0.144013	0.915774	0.188708	0.946146	0.115946	0.94608	0.116017	0.948297	0.147852	0.936423	0.125979	0.936415	0.125987	0.942604	0.15578
PORVUO	0.934134	0.129847	0.934134	0.129847	0.929137	0.173084	0.927976	0.135782	0.927976	0.135782	0.925077	0.177974	0.919011	0.143985	0.919011	0.143985	0.914782	0.189807	0.913692	0.148637	0.913692	0.148637	0.911133	0.193828	0.943146	0.120638	0.943111	0.120675	0.949204	0.146542	0.937929	0.126051	0.937929	0.126051	0.945767	0.151418
POSFOU	0.921913	0.122333	0.921913	0.122333	0.917367	0.189497	0.917766	0.125539	0.917766	0.125539	0.915453	0.191679	0.907513	0.133136	0.907513	0.133136	0.899761	0.20871	0.903065	0.1363	0.903065	0.1363	0.897651	0.210896	0.932598	0.113656	0.932598	0.113656	0.934081	0.169251	0.928213	0.117295	0.928213	0.117295	0.932066	0.171818
QIVYUR	0.92203	0.123032	0.92203	0.123032	0.917717	0.189747	0.912158	0.13059	0.912158	0.13059	0.913279	0.194798	0.909173	0.13279	0.909173	0.13279	0.905237	0.203629	0.899758	0.139503	0.899758	0.139503	0.901236	0.207883	0.943602	0.104638	0.943602	0.104638	0.949668	0.148404	0.934189	0.113033	0.934125	0.113088	0.945545	0.154362
QIWCUW	0.935572	0.0859754	0.935457	0.0860517	0.939198	0.167512	0.925894	0.0922069	0.92584	0.0922403	0.935709	0.172251	0.921551	0.0948705	0.921551	0.0948705	0.924966	0.186088	0.910652	0.101246	0.910652	0.101246	0.921127	0.190788	0.938406	0.0840631	0.938406	0.0840631	0.94503	0.159276	0.927603	0.0911372	0.927603	0.0911372	0.941325	0.164557
QOKCID	0.9202	0.143072	0.92013	0.143135	0.912778	0.191822	0.87496	0.179093	0.874002	0.179778	0.880159	0.224847	0.904464	0.156545	0.904435	0.156569	0.895831	0.209631	0.866552	0.185017	0.866552	0.185017	0.870985	0.233295	0.929748	0.134241	0.929498	0.134479	0.929256	0.172755	0.892259	0.166244	0.892133	0.166341	0.904687	0.200521
QOTBAE	0.91428	0.10993	0.91428	0.10993	0.916536	0.194907	0.91271	0.110932	0.91271	0.110932	0.915939	0.195603	0.895115	0.1216	0.895115	0.1216	0.896018	0.217549	0.89367	0.122434	0.89367	0.122434	0.895435	0.218158	0.922665	0.104415	0.922571	0.104479	0.928909	0.179882	0.921308	0.105327	0.921276	0.105348	0.928469	0.180437
QUPHUF	0.932055	0.110202	0.932011	0.110238	0.927318	0.176418	0.911702	0.125628	0.911353	0.125876	0.918015	0.187368	0.919221	0.12016	0.919221	0.12016	0.913743	0.192188	0.902305	0.132143	0.902261	0.132173	0.907277	0.199261	0.941306	0.102425	0.941306	0.102425	0.943949	0.154924	0.924446	0.116209	0.924446	0.116209	0.937641	0.16341
QURSEC	0.925856	0.109855	0.925856	0.109855	0.924563	0.18212	0.898222	0.128709	0.898222	0.128709	0.913123	0.195441	0.90993	0.12108	0.90993	0.12108	0.908063	0.201053	0.885057	0.13678	0.885057	0.13678	0.898523	0.211226	0.936865	0.101372	0.936857	0.101378	0.942534	0.158953	0.911973	0.119699	0.911878	0.119764	0.932891	0.171772
REDROI	0.915236	0.136682	0.914949	0.136914	0.919404	0.183114	0.908809	0.14177	0.907958	0.142429	0.915373	0.187637	0.89433	0.15261	0.89433	0.15261	0.897248	0.206756	0.888478	0.156779	0.888478	0.156779	0.8941	0.2099	0.91743	0.134902	0.91743	0.134902	0.924619	0.17709	0.911544	0.139627	0.911406	0.139736	0.921291	0.180957
REYBAA	0.937122	0.105089	0.937122	0.105089	0.939106	0.164991	0.917655	0.120262	0.917282	0.120534	0.930828	0.175849	0.922964	0.116321	0.922964	0.116321	0.922835	0.185731	0.901808	0.131325	0.901808	0.131325	0.914899	0.195047	0.939797	0.10283	0.939748	0.102872	0.94277	0.159951	0.918742	0.119466	0.918742	0.119466	0.934893	0.170603
SOCLAZ	0.928118	0.119838	0.928118	0.119838	0.920513	0.183445	0.923225	0.123849	0.923225	0.123849	0.918069	0.186244	0.911336	0.133094	0.911336	0.133094	0.898137	0.207666	0.906118	0.136954	0.906026	0.137022	0.89587	0.209964	0.936759	0.112404	0.936759	0.112404	0.931433	0.170379	0.931573	0.116923	0.931573	0.116923	0.929004	0.173371
SOWCOY01	0.928421	0.145935	0.928388	0.145969	0.925594	0.183473	0.927752	0.146616	0.927721	0.146647	0.924692	0.184581	0.909211	0.164356	0.909167	0.164395	0.90497	0.207347	0.909167	0.164396	0.90905	0.164502	0.904603	0.207747	0.927287	0.147087	0.926977	0.1474	0.931522	0.176012	0.927235	0.147139	0.927226	0.147148	0.931349	0.176234
TUBLIN	0.932991	0.122239	0.932983	0.122246	0.928799	0.171351	0.924477	0.129772	0.924292	0.129931	0.924353	0.17662	0.92046	0.133178	0.92046	0.133178	0.912548	0.189902	0.911642	0.140367	0.911642	0.140367	0.908451	0.194299	0.947145	0.108564	0.947145	0.108564	0.947402	0.147275	0.938449	0.117155	0.938449	0.117155	0.943228	0.153007
VACFUB01	0.921779	0.153549	0.921779	0.153549	0.922205	0.186192	0.92002	0.155267	0.919971	0.155315	0.921073	0.187542	0.905407	0.168856	0.905247	0.168999	0.904774	0.205998	0.90394	0.17016	0.903877	0.170217	0.903837	0.207009	0.935327	0.13962	0.935066	0.139902	0.942967	0.159422	0.933889	0.141165	0.933639	0.141431	0.942102	0.160625
WECJAR	0.922825	0.0993797	0.922825	0.0993797	0.922717	0.17966	0.894012	0.116463	0.893968	0.116487	0.909188	0.194753	0.905361	0.110051	0.905361	0.110051	0.901852	0.202466	0.881118	0.123344	0.881118	0.123344	0.893128	0.211273	0.934836	0.0913193	0.934802	0.0913428	0.936375	0.163015	0.910631	0.106943	0.910631	0.106943	0.927667	0.173812
WOBHIF01	0.913057	0.12661	0.913057	0.12661	0.907718	0.193294	0.912499	0.127016	0.912499	0.127016	0.907336	0.193695	0.873767	0.152559	0.873738	0.152576	0.861312	0.236964	0.873792	0.152544	0.873763	0.152561	0.861316	0.23696	0.894482	0.139481	0.89445	0.139502	0.887351	0.213563	0.894505	0.139466	0.894473	0.139486	0.887353	0.213561
XAHROQ	0.945477	0.138767	0.945477	0.138767	0.95398	0.15043	0.944353	0.140191	0.944353	0.140191	0.95304	0.151959	0.933401	0.153367	0.933188	0.153612	0.938441	0.173983	0.932292	0.154638	0.932126	0.154828	0.937566	0.175216	0.938716	0.14712	0.938716	0.14712	0.946037	0.162896	0.937602	0.148451	0.937501	0.148572	0.945044	0.164388
XARCEB	0.913369	0.119045	0.913353	0.119056	0.909781	0.196206	0.899896	0.127968	0.899896	0.127968	0.903039	0.203405	0.890274	0.133977	0.890274	0.133977	0.888183	0.218433	0.880052	0.140078	0.880052	0.140078	0.883978	0.222502	0.918334	0.115584	0.918334	0.115584	0.92909	0.173947	0.908121	0.122598	0.908121	0.122598	0.924914	0.178996
XEDPIH	0.938765	0.122431	0.938765	0.122431	0.945288	0.15482	0.936591	0.124585	0.936591	0.124585	0.944139	0.156435	0.919345	0.14051	0.919345	0.14051	0.924162	0.182275	0.917571	0.142047	0.917571	0.142047	0.923274	0.183338	0.931209	0.129765	0.931057	0.129908	0.939295	0.163077	0.929428	0.131434	0.929231	0.131617	0.938403	0.164272
XEXMEU	0.932571	0.123385	0.932571	0.123385	0.934316	0.175754	0.903921	0.147283	0.903746	0.147417	0.916726	0.197892	0.913918	0.13941	0.913918	0.13941	0.914371	0.200671	0.889029	0.158286	0.889021	0.158292	0.899993	0.216865	0.936303	0.119922	0.936226	0.119994	0.939902	0.168113	0.911718	0.14118	0.911581	0.14129	0.925639	0.187001
YARKEJ	0.928697	0.114547	0.928651	0.114584	0.92557	0.178464	0.900023	0.135637	0.900006	0.135649	0.908454	0.197923	0.914455	0.125466	0.914455	0.125466	0.911034	0.195114	0.888785	0.143058	0.888785	0.143058	0.896821	0.210123	0.939775	0.105273	0.939744	0.1053	0.946415	0.151425	0.91425	0.125616	0.914128	0.125705	0.932442	0.170026
YARSIV	0.929085	0.122777	0.928642	0.12316	0.933895	0.175728	0.920361	0.13011	0.920277	0.130178	0.930047	0.18077	0.910582	0.137867	0.910582	0.137867	0.917117	0.196769	0.903147	0.143484	0.903147	0.143484	0.913706	0.200777	0.92862	0.123179	0.928524	0.123262	0.938881	0.16897	0.92115	0.129463	0.921055	0.129541	0.935367	0.17376
YUSGID	0.933964	0.121727	0.933964	0.121727	0.928649	0.172075	0.924192	0.130423	0.923248	0.131232	0.921438	0.180561	0.921199	0.132972	0.921199	0.132972	0.911529	0.19161	0.912025	0.1405	0.911957	0.140553	0.906823	0.196641	0.94285	0.113241	0.9428	0.113291	0.941863	0.155326	0.933688	0.121981	0.933688	0.121981	0.937223	0.161406
Statistics for MOFs in Q2 (with no rotatable dihedrals, with at least one hindered dihedrals)
XORGUI	0.928778	0.14737	0.928778	0.14737	0.930956	0.17744	0.928735	0.147415	0.928735	0.147415	0.930966	0.177427	0.905308	0.169926	0.905308	0.169926	0.904905	0.208241	0.905265	0.169964	0.905265	0.169964	0.904918	0.208227

## Sheet: MOFs_statistics_Q3_Q4
MOF_name	R2_ind_dihedral_training_wc_lambda0	RMSE_ind_dihedral_training_wc_lambda0	R2_ind_dihedral_training_wc_lambda_best	RMSE_ind_dihedral_training_wc_lambda_best	R2_ind_forces_training_wc_lambda0	RMSE_ind_forces_training_wc_lambda0	R2_ind_forces_training_wc_lambda_best	RMSE_ind_forces_training_wc_lambda_best	R2_ind_validation_wc	RMSE_ind_validation_wc	R2_avg_dihedral_training_wc_lambda0	RMSE_avg_dihedral_training_wc_lambda0	R2_avg_dihedral_training_wc_lambda_best	RMSE_avg_dihedral_training_wc_lambda_best	R2_avg_forces_training_wc_lambda0	RMSE_avg_forces_training_wc_lambda0	R2_avg_forces_training_wc_lambda_best	RMSE_avg_forces_training_wc_lambda_best	R2_avg_validation_wc	RMSE_avg_validation_wc	R2_ind_dihedral_training_woc_lambda0	RMSE_ind_dihedral_training_woc_lambda0	R2_ind_dihedral_training_woc_lambda_best	RMSE_ind_dihedral_training_woc_lambda_best	R2_ind_forces_training_woc_lambda0	RMSE_ind_forces_training_woc_lambda0	R2_ind_forces_training_woc_lambda_best	RMSE_ind_forces_training_woc_lambda_best	RMSE_ind_forces_training_woc_lambda_best	RMSE_ind_validation_woc	R2_avg_dihedral_training_woc_lambda0	RMSE_avg_dihedral_training_woc_lambda0	R2_avg_dihedral_training_woc_lambda_best	RMSE_avg_dihedral_training_woc_lambda_best	R2_avg_forces_training_woc_lambda0	RMSE_avg_forces_training_woc_lambda0	R2_avg_forces_training_woc_lambda_best	RMSE_avg_forces_training_woc_lambda_best	R2_avg_validation_woc	RMSE_avg_validation_woc
Statistics for MOFs in Q3 (with at least one rotatable dihedrals, with no hindered dihedrals)
ATOXEN	0.990402	0.00164666	0.990402	0.00164666	0.932657	0.124041	0.932657	0.124041	0.934132	0.168838	0.990402	0.00164665	0.990394	0.00164735	0.925611	0.130368	0.924926	0.130967	0.929399	0.174799	0.9904	0.00164683	0.990399	0.0016469	0.913554	0.140537	0.913539	0.140549	0.916212	0.190425	0.9904	0.00164683	0.9904	0.00164683	0.907125	0.145669	0.907125	0.145669	0.911901	0.195262
BEPMEQ	0.997344	0.00297336	0.997343	0.00297413	0.925861	0.1121	0.925687	0.112232	0.929554	0.164461	0.997273	0.00301289	0.997269	0.0030154	0.917513	0.118242	0.91696	0.118639	0.924926	0.169777	0.997343	0.00297412	0.997343	0.00297412	0.913658	0.120974	0.913658	0.120974	0.916125	0.179454	0.997272	0.00301357	0.997272	0.00301357	0.906596	0.125824	0.906596	0.125824	0.912654	0.18313
BEPNUH	0.99827	0.00288065	0.99827	0.00288065	0.931689	0.106006	0.931689	0.106006	0.932851	0.160356	0.99828	0.00287163	0.998282	0.00287071	0.919603	0.115002	0.919474	0.115094	0.927437	0.166695	0.998266	0.00288325	0.998266	0.00288325	0.916976	0.116866	0.916976	0.116866	0.916417	0.178905	0.998281	0.00287154	0.998281	0.00287154	0.907617	0.123277	0.907617	0.123277	0.912174	0.18339
BEPVID	0.992096	0.00100077	0.992096	0.00100077	0.945016	0.118061	0.945016	0.118061	0.949537	0.139866	0.992012	0.00100608	0.992009	0.00100625	0.940526	0.122786	0.940486	0.122827	0.945862	0.14487	0.992086	0.00100139	0.992086	0.00100139	0.936848	0.126526	0.936848	0.126526	0.939011	0.153763	0.992002	0.0010067	0.992002	0.0010067	0.932619	0.130694	0.932619	0.130694	0.935488	0.158142
BIBBUL	0.996153	0.00242292	0.996153	0.00242303	0.936674	0.0938709	0.936656	0.0938842	0.942133	0.155834	0.996153	0.00242301	0.996153	0.00242301	0.930224	0.0985352	0.930224	0.0985352	0.939843	0.158887	0.99615	0.00242413	0.996148	0.00242453	0.924727	0.102343	0.924709	0.102355	0.928917	0.172714	0.996149	0.00242423	0.996149	0.00242423	0.918744	0.106333	0.918744	0.106333	0.926922	0.175121
BUYDEG	0.980259	0.0266249	0.980259	0.0266249	0.902635	0.114741	0.902635	0.114741	0.903584	0.207373	0.980259	0.0266249	0.980259	0.0266249	0.901916	0.115164	0.901916	0.115164	0.903321	0.207655	0.980251	0.02663	0.980251	0.02663	0.885044	0.124676	0.885044	0.124676	0.88453	0.22694	0.980251	0.0266299	0.980251	0.0266299	0.884301	0.125078	0.884301	0.125078	0.884277	0.227189
CEGDUO	0.983641	0.00157627	0.98364	0.00157635	0.943807	0.0924923	0.943766	0.0925261	0.947419	0.142631	0.983637	0.00157648	0.983623	0.00157716	0.937327	0.0976796	0.937005	0.0979301	0.944343	0.146743	0.983635	0.00157655	0.983631	0.00157678	0.932826	0.101126	0.932794	0.10115	0.935267	0.158257	0.983631	0.00157676	0.983629	0.00157687	0.926639	0.105681	0.926626	0.105691	0.932794	0.161251
CEGFAW	0.986921	0.00167102	0.986904	0.0016721	0.951494	0.0847211	0.951259	0.0849257	0.958857	0.127184	0.986921	0.00167102	0.986916	0.0016713	0.947811	0.0878782	0.947751	0.0879286	0.957625	0.129074	0.986912	0.00167161	0.986873	0.00167408	0.940095	0.0941507	0.93995	0.0942649	0.947067	0.144261	0.986911	0.00167162	0.986911	0.00167162	0.936888	0.0966386	0.936888	0.0966386	0.946097	0.145577
CUQRIR	0.996682	0.00177821	0.996681	0.00177867	0.935632	0.096198	0.935592	0.096228	0.932737	0.16865	0.996683	0.00177816	0.996674	0.00178038	0.925663	0.10338	0.925468	0.103515	0.929018	0.173249	0.996674	0.00178046	0.996674	0.00178046	0.923806	0.104663	0.923806	0.104663	0.919237	0.184801	0.996674	0.00178038	0.996674	0.00178038	0.913946	0.111228	0.913946	0.111228	0.915937	0.188538
ESIFIX	0.999335	0.0187979	0.999335	0.0187979	0.907594	0.0995391	0.907594	0.0995391	0.907956	0.1976	0.999334	0.0188125	0.999328	0.0189036	0.895254	0.105977	0.895224	0.105992	0.904121	0.201674	0.99931	0.0191545	0.99931	0.0191545	0.893203	0.10701	0.893203	0.10701	0.891323	0.214712	0.999314	0.0190896	0.999314	0.0190896	0.881843	0.112557	0.881843	0.112557	0.888355	0.217624
EWUGEK	0.982619	0.0610995	0.982617	0.0611017	0.924568	0.0969786	0.92451	0.0970159	0.926957	0.169185	0.982619	0.0610995	0.982612	0.0611104	0.884168	0.120175	0.883859	0.120335	0.909254	0.188576	0.982615	0.0611067	0.982611	0.0611134	0.912711	0.104323	0.912643	0.104363	0.913149	0.184485	0.982616	0.0611045	0.982612	0.0611102	0.871459	0.126596	0.871405	0.126623	0.896578	0.201316
FOCYUT	0.99243	0.0330183	0.99243	0.0330183	0.929316	0.125826	0.929316	0.125826	0.928813	0.177701	0.99243	0.0330191	0.99243	0.0330191	0.916493	0.136764	0.916493	0.136764	0.922473	0.185446	0.992431	0.0330158	0.99242	0.0330403	0.907126	0.14423	0.90689	0.144414	0.900848	0.209721	0.992431	0.0330158	0.992425	0.0330289	0.892415	0.155234	0.892287	0.155326	0.894588	0.216239
GIRYIR	0.996757	0.0110532	0.996757	0.0110532	0.932478	0.109729	0.932478	0.109729	0.931013	0.170343	0.996759	0.0110511	0.996759	0.0110511	0.925565	0.115209	0.925565	0.115209	0.928314	0.173644	0.996757	0.0110536	0.996757	0.0110536	0.916987	0.121666	0.916987	0.121666	0.913826	0.190384	0.996758	0.0110515	0.996758	0.0110526	0.909169	0.127267	0.909111	0.127307	0.910659	0.19385
GIWMOP	0.978564	0.0506628	0.978564	0.0506628	0.925797	0.119167	0.925797	0.119167	0.933595	0.171136	0.978562	0.0506652	0.978532	0.0507011	0.884834	0.148459	0.884189	0.148874	0.91358	0.195231	0.978552	0.0506765	0.978552	0.0506765	0.915335	0.127291	0.915335	0.127291	0.920934	0.186739	0.978551	0.050678	0.978545	0.0506853	0.87398	0.155298	0.873948	0.155317	0.904331	0.205412
GULPIN	0.984402	0.0527724	0.984402	0.0527724	0.917913	0.126554	0.917913	0.126554	0.916103	0.193005	0.984402	0.052772	0.984395	0.0527828	0.899659	0.139919	0.899401	0.140099	0.907922	0.202197	0.984396	0.0527826	0.984396	0.0527826	0.899769	0.139843	0.899769	0.139843	0.898222	0.21258	0.984396	0.0527818	0.984396	0.0527818	0.884746	0.149957	0.884746	0.149957	0.892546	0.218427
GUMDEZ	0.982459	0.0117625	0.982459	0.0117625	0.939042	0.1176	0.939042	0.1176	0.935855	0.159708	0.98246	0.0117622	0.98245	0.0117656	0.92499	0.130452	0.924779	0.130636	0.927508	0.169781	0.982452	0.0117649	0.982452	0.0117649	0.927783	0.128	0.927783	0.128	0.92472	0.173015	0.982453	0.0117645	0.982453	0.0117645	0.914601	0.139193	0.914601	0.139193	0.917797	0.180796
HEBZAR	0.995968	0.04133	0.995968	0.04133	0.918804	0.10298	0.918804	0.10298	0.917788	0.187248	0.995996	0.0411863	0.995996	0.0411863	0.903251	0.112411	0.903251	0.112411	0.91165	0.194113	0.995953	0.0414101	0.995953	0.0414101	0.902045	0.113109	0.902045	0.113109	0.89771	0.208865	0.995982	0.0412579	0.995982	0.0412579	0.888902	0.120459	0.888902	0.120459	0.894018	0.212601
HEBZEV	0.994457	0.048883	0.994457	0.048883	0.885853	0.122945	0.885853	0.122945	0.873922	0.234232	0.994381	0.0492171	0.994381	0.0492171	0.871398	0.130498	0.871398	0.130498	0.867535	0.240092	0.994395	0.049156	0.994395	0.049156	0.868288	0.132067	0.868288	0.132067	0.854472	0.251651	0.994325	0.0494602	0.994325	0.0494602	0.856487	0.137856	0.856487	0.137856	0.850133	0.255376
HIHJUF	0.989339	0.0361956	0.989339	0.0361956	0.916046	0.118517	0.916046	0.118517	0.915933	0.191565	0.989363	0.0361557	0.989363	0.0361557	0.915555	0.118863	0.915555	0.118863	0.915707	0.191824	0.989331	0.0362104	0.989331	0.0362104	0.902808	0.127519	0.902808	0.127519	0.901471	0.20739	0.989354	0.0361705	0.989354	0.0361705	0.902375	0.127803	0.902375	0.127803	0.901259	0.207613
HOXGEH	0.995248	0.00143497	0.995244	0.00143556	0.934023	0.0888292	0.933853	0.0889432	0.935906	0.149467	0.995249	0.0014349	0.995203	0.00144175	0.920735	0.0973643	0.919897	0.0978777	0.930042	0.156155	0.995239	0.00143637	0.995236	0.00143678	0.921229	0.0970602	0.921214	0.0970695	0.922091	0.164789	0.995238	0.00143652	0.995238	0.00143652	0.909749	0.103892	0.909749	0.103892	0.91786	0.169205
JIVFUQ	0.99524	0.0157168	0.99524	0.0157168	0.92285	0.167072	0.92285	0.167072	0.922617	0.178374	0.99524	0.0157169	0.99524	0.0157169	0.922223	0.167749	0.922223	0.167749	0.922263	0.178782	0.995222	0.0157466	0.995222	0.0157466	0.912098	0.178334	0.912098	0.178334	0.914376	0.187633	0.995222	0.0157467	0.995222	0.0157467	0.912097	0.178335	0.912097	0.178335	0.914372	0.187637
KACZUM	0.987401	0.0334286	0.987387	0.0334479	0.923532	0.148697	0.923309	0.148914	0.91629	0.192271	0.987401	0.0334284	0.987387	0.0334478	0.923484	0.148744	0.923261	0.14896	0.916273	0.19229	0.987387	0.0334479	0.987387	0.0334479	0.910137	0.161196	0.910137	0.161196	0.903192	0.206766	0.987387	0.0334477	0.987387	0.0334477	0.910093	0.161235	0.910093	0.161235	0.90318	0.206778
KATDAM	0.98053	0.0973942	0.98053	0.0973942	0.935786	0.0835413	0.935786	0.0835413	0.939849	0.16227	0.980521	0.097416	0.980519	0.0974205	0.914111	0.0966174	0.914051	0.0966509	0.931224	0.173514	0.980528	0.0973997	0.980528	0.0973997	0.921312	0.0924784	0.921312	0.0924784	0.924899	0.181319	0.980519	0.0974223	0.980519	0.0974223	0.900794	0.103838	0.900794	0.103838	0.918546	0.188831
KINJUO	0.984522	0.00225617	0.984521	0.00225625	0.940253	0.0842696	0.940156	0.0843385	0.943041	0.16083	0.984522	0.00225621	0.984521	0.00225624	0.921795	0.0964122	0.921759	0.0964342	0.936215	0.170195	0.984521	0.00225631	0.984521	0.00225631	0.926623	0.0933889	0.926623	0.0933889	0.925597	0.183816	0.98452	0.00225635	0.98452	0.00225635	0.907407	0.104907	0.907407	0.104907	0.920469	0.190044
MEJQID	0.998039	0.022485	0.998031	0.022535	0.915113	0.146622	0.915017	0.146705	0.909546	0.198816	0.998035	0.022509	0.998026	0.0225598	0.912643	0.14874	0.912547	0.148821	0.907541	0.201007	0.998024	0.0225716	0.998024	0.0225716	0.899767	0.159324	0.899767	0.159324	0.892889	0.216348	0.99802	0.0225972	0.99802	0.0225972	0.897383	0.161208	0.897383	0.161208	0.891048	0.2182
OTOZOO	0.981078	0.00252097	0.981078	0.00252097	0.931423	0.120626	0.931423	0.120626	0.932456	0.173337	0.981084	0.00252057	0.981084	0.00252057	0.92854	0.123135	0.92854	0.123135	0.93067	0.175614	0.981075	0.0025212	0.981075	0.0025212	0.916098	0.133425	0.916098	0.133425	0.914494	0.195028	0.981081	0.0025208	0.981081	0.0025208	0.913769	0.135265	0.913769	0.135265	0.913464	0.196199
PEGBEK01	0.995855	0.00211935	0.995855	0.00211935	0.943673	0.098233	0.943673	0.098233	0.946405	0.148619	0.995854	0.00211939	0.995853	0.00211971	0.928159	0.11094	0.928142	0.110952	0.93937	0.158072	0.995845	0.00212185	0.995832	0.00212515	0.929713	0.109733	0.929666	0.10977	0.931092	0.168518	0.995845	0.0021219	0.995845	0.0021219	0.915884	0.120044	0.915884	0.120044	0.925275	0.175487
PITMOW	0.979698	0.0529177	0.979684	0.0529352	0.921978	0.0902484	0.921882	0.0903037	0.924609	0.178164	0.979777	0.0528145	0.979766	0.0528294	0.898527	0.102922	0.898437	0.102967	0.916723	0.18725	0.979678	0.0529437	0.979678	0.0529437	0.905137	0.0995127	0.905137	0.0995127	0.906896	0.197989	0.979759	0.0528381	0.979759	0.0528381	0.880725	0.111585	0.880725	0.111585	0.8991	0.206112
PUFVUJ	0.961035	0.00208312	0.961035	0.00208312	0.929858	0.0963451	0.929858	0.0963451	0.927394	0.174873	0.961035	0.00208312	0.961035	0.00208312	0.924883	0.0997036	0.924883	0.0997036	0.926007	0.176535	0.961034	0.00208315	0.961034	0.00208315	0.91374	0.106843	0.91374	0.106843	0.908844	0.195943	0.961034	0.00208315	0.961034	0.00208315	0.908827	0.109844	0.908827	0.109844	0.907816	0.197044
QESYOD	0.996257	0.00369187	0.996257	0.00369187	0.951532	0.0714619	0.951532	0.0714619	0.959041	0.121888	0.996252	0.00369423	0.996251	0.00369489	0.940349	0.0792787	0.940312	0.079303	0.955601	0.126904	0.996253	0.00369377	0.996253	0.00369377	0.941556	0.0784722	0.941556	0.0784722	0.947972	0.137375	0.996247	0.00369645	0.996247	0.00369645	0.930176	0.0857724	0.930176	0.0857724	0.944755	0.141557
SARBOE	0.986086	0.0403386	0.986086	0.0403386	0.906307	0.149123	0.906307	0.149123	0.897033	0.215139	0.986082	0.0403452	0.98605	0.0403913	0.880127	0.168676	0.880019	0.168752	0.883839	0.228507	0.986046	0.0403975	0.986046	0.0403975	0.892123	0.160014	0.892123	0.160014	0.880691	0.231582	0.98604	0.0404056	0.98604	0.0404056	0.867932	0.177048	0.867932	0.177048	0.869608	0.2421
SARBUK	0.984176	0.0452557	0.984174	0.0452581	0.911659	0.0860537	0.911642	0.0860618	0.905526	0.202305	0.984183	0.0452445	0.984183	0.0452445	0.899341	0.0918573	0.899341	0.0918573	0.901457	0.206616	0.984161	0.0452764	0.984161	0.0452764	0.897183	0.0928368	0.897183	0.0928368	0.888761	0.219523	0.984168	0.0452663	0.98416	0.0452778	0.884537	0.0983806	0.884502	0.0983952	0.884841	0.223357
TEPGUS	0.992862	0.0354252	0.9928	0.0355775	0.906754	0.151694	0.906636	0.151789	0.900239	0.216087	0.992845	0.0354672	0.992845	0.0354672	0.89172	0.163465	0.89172	0.163465	0.893291	0.223484	0.99278	0.0356292	0.992719	0.0357781	0.892234	0.163077	0.892225	0.163084	0.884604	0.232403	0.992753	0.0356934	0.992667	0.0359068	0.877109	0.174146	0.87709	0.174159	0.877785	0.239171
UKALEZ	0.979417	0.00189788	0.979417	0.00189788	0.926291	0.104943	0.926291	0.104943	0.922628	0.179872	0.979418	0.00189783	0.979418	0.00189783	0.915366	0.112452	0.915366	0.112452	0.918488	0.184622	0.979407	0.00189832	0.979407	0.00189832	0.910124	0.115882	0.910124	0.115882	0.904895	0.199422	0.979409	0.00189827	0.979409	0.00189827	0.899242	0.122697	0.899242	0.122697	0.901135	0.203326
WIYFAM	0.95571	0.000935	0.955709	0.00093501	0.937796	0.108219	0.937736	0.108271	0.937876	0.157335	0.95571	0.000935	0.955708	0.00093502	0.935566	0.110142	0.935445	0.110245	0.937426	0.157903	0.955706	0.00093505	0.955706	0.00093505	0.926274	0.117816	0.926274	0.117816	0.925804	0.171943	0.955706	0.00093505	0.955706	0.00093505	0.924108	0.119534	0.924108	0.119534	0.925469	0.172332
Statistics for MOFs in Q4 (with at least one rotatable dihedrals, with at least one hindered dihedrals)
IBICED	0.994067	0.00520391	0.994067	0.00520391	0.94142	0.0916883	0.94142	0.0916883	0.942207	0.14608	0.994048	0.00521208	0.994048	0.00521208	0.909159	0.114178	0.909159	0.114178	0.924934	0.166486	0.994061	0.00520656	0.994061	0.00520656	0.929057	0.100901	0.929057	0.100901	0.926995	0.164185	0.994042	0.00521472	0.99404	0.00521551	0.901252	0.119043	0.901236	0.119053	0.914484	0.177696
TUMDEM	0.928592	0.00276613	0.928592	0.00276613	0.915492	0.136635	0.915475	0.136649	0.913063	0.194965	0.928594	0.00276609	0.928559	0.00276677	0.904081	0.145568	0.901935	0.147188	0.904971	0.203837	0.928589	0.00276618	0.928589	0.00276618	0.893269	0.153554	0.893269	0.153554	0.891583	0.217722	0.928592	0.00276614	0.928592	0.00276614	0.884098	0.160015	0.884098	0.160015	0.887524	0.22176

## Sheet: MOFs_runtime_info
MOF_name	run time(hr) avg wc AP	run time(hr) ind wc AP	run time(hr) avg woc AP	run time(hr) ind woc AP	run time(hr) avg woc BP	run time(hr) ind woc BP
Run time for MOFs in Q1 (with no rotatable dihedrals, with no hindered dihedrals)
AFITEP	1.71	1.61	1.32	1.28	1.94	1.86
AMOYOR	2.43	2.17	1.58	1.51	3.41	3.07
ARAKAH	14.09	13.18	9.43	8.98	18.94	18.14
ARIBOS	4.3	4.44	2.96	2.83	6.24	6.01
ATOBIW	31.94	30.07	21.9	24.21	41.99	38.51
BOMCOX	22.94	21.16	15.15	14.41	27.07	28.75
BUSQIQ	0.56	0.49	0.32	0.31	0.77	0.75
BUVWOF03	16.58	15.53	10.61	10.2	24.23	19.84
BUVYIB	4.36	4.5	3.06	3.15	5.31	5.1
COMDOY	0.27	0.26	0.18	0.17	0.35	0.34
DIXJIF	8.44	7.99	6.22	5.42	12.41	10.84
DONNEA	0.27	0.26	0.22	0.21	0.54	0.53
DONNIE	0.6	0.57	0.48	0.47	0.77	0.75
EBEMII	4.5	4.27	3.09	2.97	5.36	5.38
EBOBIJ	2.09	1.96	1.5	1.43	2.67	2.67
EBOBUV	2.54	2.68	1.86	1.79	3.22	3.1
EKEHUZ	1.19	1.13	0.89	0.87	1.93	1.83
EMIVAY	9.54	9.01	5.72	5.43	11.17	10.89
EMOFIX	7.94	7.41	5.05	4.78	10.74	10.27
ESEDAJ	7.73	7.34	5.34	5.12	11.32	10.92
FIPWOS	0.94	0.88	0.65	0.62	1.3	1.22
FIPXEJ	3.96	3.71	2.54	2.39	5.65	4.99
FUBNOH	2.51	2.39	1.99	1.93	4.15	3.85
FURFOP	7.09	7.49	4.72	4.47	9.12	8.62
GUYLOC	8.58	8.13	5.78	5.52	11.65	11.19
GUYLUI	8.66	8.11	5.9	5.61	14.13	12.7
HECQUB	15	13.14	9.14	8.88	25.75	20.09
HIFTOG02	5.9	5.92	4.65	4.53	6.63	6.36
HIFVUO	9.97	9.63	6.88	6.65	11.68	11.86
HOZDOR	0.94	0.88	0.72	0.69	1.23	1.34
IBOCIO	4.09	3.79	2.59	2.47	5.61	5
KEWZOD	3.46	3.01	2.27	2.62	4.2	3.96
KINDIW	2.47	2.28	1.51	1.45	3.16	3
KURSOH	4.75	4.87	4.07	3.85	5.9	7.29
LALYOO	18.09	17.28	11.93	11.59	23.45	22.76
LIWXIZ	5.19	4.81	3.61	3.41	6.44	6.34
LODPOL	4.84	4.81	3.39	3.22	6.75	6.48
LOJLAZ	2.45	2.33	1.95	1.88	3.2	2.93
LUFCAS	3.39	3.19	2.4	2.6	4.66	4.5
MADVUJ	2.14	2.03	1.59	1.53	3.14	3.03
MADWAQ	2.4	2.26	1.75	1.78	3.18	3.07
MAZSUD	0.79	0.67	0.54	0.51	0.93	0.89
MEKDUC	3.3	2.91	2.27	2.03	4.05	3.87
MIBQAR01	15.76	15.64	10.72	10.64	26.97	23.19
MIZKOW	4.15	3.91	2.91	2.75	6.07	5.48
MOPFOO	4.65	4.06	3.16	3.07	7.46	7.29
MUGQAI	10.16	9.6	6.88	6.55	14.36	14.96
NEKREB	3.81	3.69	2.83	2.77	6.89	6.81
NOMQAJ01	3.43	3.24	2.55	2.45	4.09	3.91
OGIBUD	1.28	1.2	0.83	0.8	1.51	1.45
OJIWIO	5.02	4.69	3.05	2.91	6.18	6
OPOBIF	9.05	8.5	6.64	6.09	13.84	12.64
OVICUS	2.19	2.06	1.54	1.67	3.16	2.79
PEYPIU	3.59	3.34	2.47	2.34	4.76	5
PIXHUB	3.28	2.83	1.98	1.92	4.46	3.7
PORVUO	1.73	1.62	1.22	1.16	2.12	2.04
POSFOU	3.39	3.19	2.34	2.5	4.47	4.64
QIVYUR	2.56	2.45	1.84	1.73	3.46	3.3
QIWCUW	18.66	18.08	13.4	12.53	27.46	29.29
QOKCID	1.92	1.81	1.2	1.14	2.19	2.06
QOTBAE	6.61	6.71	5.73	5.55	10.57	10.27
QUPHUF	6.6	6.2	4.37	3.92	7.64	8.02
QURSEC	5.29	5	3.48	3.33	7.3	7.97
REDROI	3.01	2.77	2.36	2.25	4.09	4.24
REYBAA	6.36	5.97	4.28	4.05	7.7	7.2
SOCLAZ	4.69	4.35	3.13	2.97	6.65	6.58
SOWCOY01	1.72	1.58	1.1	1.2	2.14	1.86
TUBLIN	4.2	3.92	2.98	2.89	6.22	5.88
VACFUB01	0.84	0.91	0.62	0.59	1.14	1.02
WECJAR	11.13	10.39	6.77	6.46	12.93	12.45
WOBHIF01	3.82	3.69	2.79	2.71	5.25	5.13
XAHROQ	0.9	0.83	0.58	0.57	1.35	1.37
XARCEB	6.73	6.33	4.51	4.31	8.8	8.47
XEDPIH	2.25	2.11	1.69	1.61	3.86	3.57
XEXMEU	3.76	3.54	2.63	2.5	5.26	4.74
YARKEJ	4.97	4.65	3.65	3.46	6.47	6.18
YARSIV	4.42	4.42	3.17	3.02	6.88	6.16
YUSGID	4.26	3.96	2.97	2.64	5.71	5.42
Run time for MOFs in Q2 (with no rotatable dihedrals, with at least one hindered dihedrals)
XORGUI	1.39	1.35	0.92	0.88
Run time for MOFs in Q3 (with at least one rotatable dihedrals, with no hindered dihedrals)
ATOXEN	3.9	3.4	2.52	2.38
BEPMEQ	3.99	4.03	2.71	2.59
BEPNUH	4.8	4.89	3.52	3.18
BEPVID	2.74	3.1	1.88	1.75
BIBBUL	10.85	10.17	7.16	6.78
BUYDEG	8.78	10.19	6.15	5.93
CEGDUO	3.94	3.73	2.73	2.65
CEGFAW	5.94	5.69	4.24	4.3
CUQRIR	7.49	7.39	4.84	4.63
ESIFIX	16.45	15.27	12.71	12.22
EWUGEK	13.81	12.8	7.93	8.23
FOCYUT	4.4	4.11	3.2	2.68
GIRYIR	7.52	7.72	5.54	5.28
GIWMOP	4.38	4.11	2.99	2.85
GULPIN	4.79	4.74	3.25	3.1
GUMDEZ	2.19	2.33	1.48	1.52
HEBZAR	12.09	11.62	8.72	8.47
HEBZEV	11.87	10.69	8.53	8.23
HIHJUF	5.79	5.55	4.03	3.88
HOXGEH	10.78	9.42	6.77	6.45
JIVFUQ	0.46	0.44	0.3	0.28
KACZUM	1.58	1.35	1.01	0.97
KATDAM	29.67	26.45	18.51	17.6
KINJUO	25.73	21.76	15.1	14.35
MEJQID	2.57	2.1	1.54	1.47
OTOZOO	4.06	3.81	2.75	2.62
PEGBEK01	6.57	6.16	4.23	4.03
PITMOW	29.04	26.97	19.98	18.91
PUFVUJ	12.58	11.91	8.95	8.49
QESYOD	14.43	12.94	10.38	10.03
SARBOE	2.81	2.37	1.75	1.81
SARBUK	27.69	24.12	16.84	18.21
TEPGUS	3.14	2.95	1.88	1.8
UKALEZ	8.61	8.12	5.32	5.48
WIYFAM	2.24	2.2	1.71	1.52
Run time for MOFs in Q4 (with at least one rotatable dihedrals, with at least one hindered dihedrals)
IBICED	7.1	6.43	4.76	4.24
TUMDEM	3.63	3.4	2.47	2.3

## Sheet: MOFs_rot_smart_selected_modes
MOF_name	dihedral type index	mode 1	mode 2	mode 3	mode 4	mode 5	mode 6	mode 7
Smart-selected modes for MOFs in Q3 (with at least one rotatable dihedrals, with no hindered dihedrals)
KINJUO
	56	0	0	1	0	0	0	1
	57	0	0	1	0	0	0	0
SARBOE
	16	1	1	0	0	1	0	0
	17	0	1	0	0	0	1	0
BEPVID
	10	0	1	1	0	0	0	1
	11	0	1	1	0	0	0	1
	12	1	1	1	0	1	1	1
	24	1	1	1	0	0	0	0
	25	0	1	1	0	0	0	0
KATDAM
	20	0	1	0	0	0	1	0
	21	0	1	0	0	0	1	0
	22	0	1	0	0	0	1	0
HEBZEV
	7	0	1	0	0	0	0	0
HOXGEH
	0	0	0	1	0	0	0	1
	1	0	0	1	0	0	0	0
	6	0	0	1	0	0	0	0
	7	0	0	1	0	0	0	0
	8	0	0	1	0	0	0	0
	9	0	0	1	0	0	0	0
	10	0	0	1	0	0	0	0
	11	0	0	1	0	0	0	1
	18	1	0	1	0	0	0	0
	19	1	0	1	0	0	0	0
	20	0	0	1	0	0	0	0
	21	0	0	1	0	0	0	0
	26	1	0	1	0	0	0	0
	27	0	0	1	0	0	0	0
JIVFUQ
	3	1	1	1	0	0	0	0
	8	1	1	1	0	0	0	0
BUYDEG
	2	1	1	1	0	1	0	0
QESYOD
	66	0	0	1	0	0	0	0
	67	0	0	1	0	0	0	0
	68	0	0	1	0	0	0	0
	69	0	0	1	0	0	0	0
	70	0	0	1	0	0	0	0
	71	0	0	1	0	0	0	0
	72	0	0	1	0	0	0	0
	73	0	0	1	0	0	0	0
	74	0	0	1	0	0	0	0
CEGDUO
	5	0	0	1	0	0	0	1
	6	0	0	1	0	0	0	0
ATOXEN
	34	0	0	1	0	0	0	0
	35	0	0	1	0	0	0	0
BEPMEQ
	14	0	0	1	0	0	0	0
CEGFAW
	11	0	0	1	0	0	0	0
	12	0	0	1	0	0	0	0
	13	0	0	1	0	0	0	1
	14	0	0	1	0	0	0	0
PUFVUJ
	9	0	0	1	0	0	0	1
HIHJUF
	16	0	1	0	0	0	0	0
CUQRIR
	20	0	1	1	0	0	0	0
	21	1	0	1	0	0	0	0
BEPNUH
	41	0	0	1	0	0	0	0
	42	0	0	1	0	0	0	0
	43	0	0	1	0	0	0	0
PEGBEK01
	33	0	0	1	0	0	0	0
	34	0	0	1	0	0	0	0
	35	0	0	1	0	0	0	0
	39	1	1	1	0	1	0	1
SARBUK
	7	0	1	0	0	0	0	0
PITMOW
	0	0	0	1	0	0	0	0
	1	0	0	1	0	0	0	0
	2	0	0	1	0	0	0	0
	3	0	0	1	0	0	0	0
	4	0	0	1	0	0	0	0
KACZUM
	2	1	1	1	0	1	0	0
HEBZAR
	4	0	1	0	0	0	0	0
	6	0	1	0	0	0	0	0
	7	0	1	0	0	0	0	0
	8	0	1	0	0	0	0	0
	9	0	1	0	0	0	0	0
BIBBUL
	30	0	0	1	0	0	0	0
	31	1	0	1	0	0	0	0
MEJQID
	10	0	1	0	0	0	0	0
UKALEZ
	14	1	1	1	0	0	0	0
	17	1	1	1	0	0	0	0
GULPIN
	32	0	0	1	0	0	0	0
WIYFAM
	3	0	1	1	0	0	0	1
GIRYIR
	23	0	1	0	0	0	1	0
	24	0	1	0	0	0	1	0
	25	0	1	0	0	0	1	0
TEPGUS
	7	1	1	1	0	1	0	0
	15	0	1	0	0	0	0	0
ESIFIX
	0	0	0	1	0	0	0	0
	3	0	1	0	0	0	0	0
	4	0	1	0	0	0	0	0
	5	0	1	0	0	0	0	0
	6	0	1	0	0	0	0	0
	9	0	1	0	0	0	0	0
FOCYUT
	7	1	1	1	0	1	0	0
EWUGEK
	35	1	1	0	0	0	0	0
OTOZOO
	28	1	1	1	0	0	0	1
GIWMOP
	11	1	1	0	0	0	0	0
GUMDEZ
	4	0	0	1	0	0	0	0
	5	0	0	1	0	0	0	0
Smart-selected modes for MOFs in Q4 (with at least one rotatable dihedrals, with at least one hindered dihedrals)
IBICED
	23	0	0	1	0	0	0	0
	24	0	0	1	0	0	0	0
TUMDEM
	11	0	1	1	0	1	0	1

## Sheet: MOFs_Q1_Q2_number_of_k's
MOF_name	#k's bond_stretch_TA_avg	#k's bond_stretch_lambda0_avg	#k's bond_stretch_lambda_best_avg	#k's UB_stretch_TA_avg	#k's UB_stretch_lambda0_avg	#k's UB_stretch_lambda_best_avg	#k's bends_TA_avg	#k's bends_lambda0_avg	#k's bends_lambda_best_avg	#k's bond_bond_cross_TA_avg	#k's bond_bond_cross_lambda0_avg	#k's bond_bond_cross_lambda_best_avg	#k's NR_hind_dihed_TA_avg	#k's NR_hind_dihed_lambda0_avg	#k's NR_hind_dihed_lambda_best_avg	#k's dihed_with_linear_bond_angle_TA_avg	#k's dihed_with_linear_bond_angle_lambda0_avg	#k's dihed_with_linear_bond_angle_lambda_best_avg	#k's tot_TA_avg	#k's tot_lambda0_avg	#k's tot_lambda_best_avg	#k's bond_stretch_TA_ind	#k's bond_stretch_lambda0_ind	#k's bond_stretch_lambda_best_ind	#k's UB_stretch_TA_ind	#k's UB_stretch_lambda0_ind	#k's UB_stretch_lambda_best_ind	#k's bends_TA_ind	#k's bends_lambda0_ind	#k's bends_lambda_best_ind	#k's bond_bond_cross_TA_ind	#k's bond_bond_cross_lambda0_ind	#k's bond_bond_cross_lambda_best_ind	#k's NR_hind_dihed_TA_ind	#k's NR_hind_dihed_lambda0_ind	#k's NR_hind_dihed_lambda_best_ind	#k's dihed_with_linear_bond_angle_TA_ind	#k's dihed_with_linear_bond_angle_lambda0_ind	#k's dihed_with_linear_bond_angle_lambda_best_ind	#k's tot_TA_ind	#k's tot_lambda0_ind	#k's tot_lambda_best_ind
Number of k's for MOFs in Q1 (with no rotatable dihedrals, with no hindered dihedrals) with bond-bond cross terms
AFITEP	17	17	17	0	0	0	39	37	37	39	39	38	27	24	24	0	0	0	122	117	116	17	17	17	0	0	0	39	38	38	39	39	39	27	24	24	0	0	0	122	118	118
AMOYOR	18	18	18	0	0	0	49	48	48	49	46	41	24	22	22	0	0	0	140	134	129	18	18	18	0	0	0	49	48	48	49	48	46	24	22	22	0	0	0	140	136	134
ARAKAH	22	22	22	0	0	0	65	63	63	65	65	64	30	29	29	0	0	0	182	179	178	22	22	22	0	0	0	65	63	63	65	64	64	30	29	29	0	0	0	182	178	178
ARIBOS	22	22	22	0	0	0	62	54	53	62	60	56	37	35	35	0	0	0	183	171	166	22	22	22	0	0	0	62	53	53	62	62	61	37	35	35	0	0	0	183	172	171
ATOBIW	28	28	28	0	0	0	79	78	78	79	73	66	45	44	44	0	0	0	231	223	216	28	28	28	0	0	0	79	77	77	79	78	76	45	45	45	0	0	0	231	228	226
BOMCOX	24	24	24	0	0	0	86	80	80	86	85	85	80	77	77	0	0	0	276	266	266	24	24	24	0	0	0	86	80	78	86	85	85	80	77	77	0	0	0	276	266	264
BUSQIQ	12	12	12	1	1	1	40	26	26	47	46	28	18	10	10	0	0	0	118	95	77	12	12	12	1	1	1	40	25	26	47	46	27	18	9	9	0	0	0	118	93	75
BUVWOF03	24	24	24	0	0	0	51	51	51	51	51	50	47	42	42	0	0	0	173	168	167	24	24	24	0	0	0	51	51	51	51	51	51	47	42	42	0	0	0	173	168	168
BUVYIB	24	24	24	0	0	0	54	54	54	54	53	53	45	44	44	0	0	0	177	175	175	24	24	24	0	0	0	54	54	54	54	53	53	45	44	44	0	0	0	177	175	175
COMDOY	8	8	8	0	0	0	16	14	14	16	16	16	6	4	4	0	0	0	46	42	42	8	8	8	0	0	0	16	14	14	16	16	16	6	4	4	0	0	0	46	42	42
DIXJIF	21	21	21	0	0	0	57	56	56	57	57	57	26	25	25	0	0	0	161	159	159	21	21	21	0	0	0	57	56	56	57	57	57	26	25	25	0	0	0	161	159	159
DONNEA	8	8	8	0	0	0	21	18	18	21	21	19	8	6	6	0	0	0	58	53	51	8	8	8	0	0	0	21	19	19	21	19	19	8	6	6	0	0	0	58	52	52
DONNIE	7	7	7	0	0	0	15	12	12	15	15	14	6	5	5	0	0	0	43	39	38	7	7	7	0	0	0	15	12	12	15	15	14	6	5	5	0	0	0	43	39	38
EBEMII	22	22	22	2	2	2	58	52	52	60	60	60	47	42	42	0	0	0	189	178	178	22	22	22	2	2	2	58	53	53	60	59	59	47	41	41	0	0	0	189	177	177
EBOBIJ	15	15	15	0	0	0	31	31	31	31	31	30	14	13	13	0	0	0	91	90	89	15	15	15	0	0	0	31	31	31	31	31	31	14	13	13	0	0	0	91	90	90
EBOBUV	17	17	17	0	0	0	30	27	27	30	30	30	16	16	16	0	0	0	93	90	90	17	17	17	0	0	0	30	27	27	30	30	27	16	16	16	0	0	0	93	90	87
EKEHUZ	7	7	7	0	0	0	28	27	27	28	27	27	17	7	6	0	0	0	80	68	67	7	7	7	0	0	0	28	27	27	28	27	26	17	7	7	0	0	0	80	68	67
EMIVAY	29	29	29	0	0	0	73	72	72	73	73	67	33	29	29	0	0	0	208	203	197	29	29	29	0	0	0	73	73	73	73	73	69	33	29	29	0	0	0	208	204	200
EMOFIX	30	30	30	0	0	0	87	84	84	87	81	75	33	30	30	0	0	0	237	225	219	30	30	30	0	0	0	87	84	84	87	86	76	33	30	30	0	0	0	237	230	220
ESEDAJ	12	12	12	0	0	0	41	37	37	41	41	41	30	27	27	0	0	0	124	117	117	12	12	12	0	0	0	41	38	38	41	41	41	30	27	27	0	0	0	124	118	118
FIPWOS	28	28	28	0	0	0	59	59	59	59	56	56	18	14	14	0	0	0	164	157	157	28	28	28	0	0	0	59	59	59	59	55	55	18	14	14	0	0	0	164	156	156
FIPXEJ	31	31	31	0	0	0	114	113	111	114	112	26	37	31	25	0	0	0	296	287	193	31	31	31	0	0	0	114	113	113	114	109	104	37	31	31	0	0	0	296	284	279
FUBNOH	16	16	16	0	0	0	35	31	31	35	35	35	17	16	16	0	0	0	103	98	98	16	16	16	0	0	0	35	31	31	35	35	34	17	16	16	0	0	0	103	98	97
FURFOP	24	24	24	0	0	0	99	96	95	99	97	82	69	59	55	0	0	0	291	276	256	24	24	24	0	0	0	99	94	94	99	95	93	69	58	58	0	0	0	291	271	269
GUYLOC	18	18	18	0	0	0	55	54	54	55	55	55	30	29	29	0	0	0	158	156	156	18	18	18	0	0	0	55	54	54	55	55	55	30	29	29	0	0	0	158	156	156
GUYLUI	19	19	19	0	0	0	54	53	53	54	54	53	30	27	27	0	0	0	157	153	152	19	19	19	0	0	0	54	54	54	54	54	54	30	28	28	0	0	0	157	155	155
HECQUB	15	15	15	0	0	0	29	25	25	29	29	29	10	10	10	4	2	2	87	81	81	15	15	15	0	0	0	29	25	25	29	29	29	10	10	10	4	2	2	87	81	81
HIFTOG02	7	7	7	0	0	0	22	21	21	22	22	22	36	24	24	0	0	0	87	74	74	7	7	7	0	0	0	22	21	21	22	22	22	36	24	24	0	0	0	87	74	74
HIFVUO	6	6	6	0	0	0	23	23	23	23	23	23	35	20	19	0	0	0	87	72	71	6	6	6	0	0	0	23	23	23	23	23	23	35	19	19	0	0	0	87	71	71
HOZDOR	11	11	11	0	0	0	51	48	47	51	50	42	33	16	17	0	0	0	146	125	117	11	11	11	0	0	0	51	47	47	51	51	49	33	17	16	0	0	0	146	126	123
IBOCIO	22	22	22	0	0	0	102	100	100	102	96	70	56	41	39	0	0	0	282	259	231	22	22	22	0	0	0	102	101	99	102	101	85	56	41	38	0	0	0	282	265	244
KEWZOD	19	19	19	0	0	0	45	43	43	45	45	45	26	23	23	2	1	1	137	131	131	19	19	19	0	0	0	45	42	42	45	45	45	26	23	23	2	1	1	137	130	130
KINDIW	20	20	20	3	3	3	76	67	66	83	82	41	37	31	31	0	0	0	219	203	161	20	20	20	3	3	3	76	69	69	83	81	71	37	32	32	0	0	0	219	205	195
KURSOH	24	24	24	0	0	0	59	56	56	59	57	51	37	32	32	0	0	0	179	169	163	24	24	24	0	0	0	59	56	56	59	59	59	37	34	34	0	0	0	179	173	173
LALYOO	15	15	15	2	2	2	45	37	37	49	49	49	36	22	22	0	0	0	147	125	125	15	15	15	2	2	2	45	37	37	49	48	48	36	21	21	0	0	0	147	123	123
LIWXIZ	32	32	32	0	0	0	112	108	106	112	111	46	55	48	44	0	0	0	311	299	228	32	32	32	0	0	0	112	108	108	112	112	108	55	48	49	0	0	0	311	300	297
LODPOL	21	21	21	0	0	0	60	59	59	60	59	57	36	34	34	0	0	0	177	173	171	21	21	21	0	0	0	60	59	59	60	59	58	36	33	33	0	0	0	177	172	171
LOJLAZ	13	13	13	0	0	0	30	29	29	30	30	30	16	16	16	0	0	0	89	88	88	13	13	13	0	0	0	30	29	29	30	30	30	16	16	16	0	0	0	89	88	88
LUFCAS	18	18	18	0	0	0	41	35	35	41	41	40	19	18	18	0	0	0	119	112	111	18	18	18	0	0	0	41	35	35	41	41	40	19	18	18	0	0	0	119	112	111
MADVUJ	8	8	8	0	0	0	31	31	31	31	30	30	14	13	13	0	0	0	84	82	82	8	8	8	0	0	0	31	31	31	31	29	29	14	13	13	0	0	0	84	81	81
MADWAQ	8	8	8	0	0	0	32	32	32	32	30	30	21	20	20	0	0	0	93	90	90	8	8	8	0	0	0	32	32	32	32	31	30	21	20	20	0	0	0	93	91	90
MAZSUD	19	19	19	0	0	0	46	39	37	46	46	26	28	22	21	0	0	0	139	126	103	19	19	19	0	0	0	46	39	38	46	46	39	28	22	22	0	0	0	139	126	118
MEKDUC	20	20	20	0	0	0	49	47	47	49	49	41	33	29	29	0	0	0	151	145	137	20	20	20	0	0	0	49	48	48	49	49	49	33	29	29	0	0	0	151	146	146
MIBQAR01	7	7	7	0	0	0	11	10	10	11	11	11	6	5	5	0	0	0	35	33	33	7	7	7	0	0	0	11	10	10	11	11	11	6	5	5	0	0	0	35	33	33
MIZKOW	22	22	22	0	0	0	81	66	66	81	81	71	36	31	31	0	0	0	220	200	190	22	22	22	0	0	0	81	66	66	81	80	79	36	31	31	0	0	0	220	199	198
MOPFOO	13	13	13	0	0	0	27	26	26	27	27	27	12	9	9	0	0	0	79	75	75	13	13	13	0	0	0	27	26	26	27	27	27	12	9	9	0	0	0	79	75	75
MUGQAI	22	22	22	0	0	0	63	61	60	63	63	61	33	31	31	0	0	0	181	177	174	22	22	22	0	0	0	63	59	59	63	63	63	33	30	30	0	0	0	181	174	174
NEKREB	7	7	7	0	0	0	13	13	13	13	13	13	4	4	4	0	0	0	37	37	37	7	7	7	0	0	0	13	13	13	13	13	13	4	4	4	0	0	0	37	37	37
NOMQAJ01	19	19	19	0	0	0	45	41	41	45	44	44	35	34	34	0	0	0	144	138	138	19	19	19	0	0	0	45	41	41	45	44	44	35	34	34	0	0	0	144	138	138
OGIBUD	12	12	12	0	0	0	42	34	34	42	39	38	23	21	20	0	0	0	119	106	104	12	12	12	0	0	0	42	34	33	42	42	39	23	22	22	0	0	0	119	110	106
OJIWIO	22	22	22	0	0	0	58	57	57	58	57	56	38	36	36	0	0	0	176	172	171	22	22	22	0	0	0	58	57	57	58	58	57	38	36	35	0	0	0	176	173	171
OPOBIF	27	27	27	0	0	0	73	66	66	73	68	62	67	50	50	0	0	0	240	211	205	27	27	27	0	0	0	73	66	66	73	73	73	67	53	53	0	0	0	240	219	219
OVICUS	22	22	22	0	0	0	54	50	50	54	54	54	26	22	22	0	0	0	156	148	148	22	22	22	0	0	0	54	51	51	54	54	54	26	22	22	0	0	0	156	149	149
PEYPIU	19	19	19	0	0	0	78	77	77	78	78	78	62	56	56	0	0	0	237	230	230	19	19	19	0	0	0	78	77	77	78	77	77	62	57	57	0	0	0	237	230	230
PIXHUB	19	19	19	1	1	1	74	74	74	77	76	53	49	42	41	0	0	0	220	212	188	19	19	19	1	1	1	74	74	74	77	76	76	49	41	41	0	0	0	220	211	211
PORVUO	17	17	17	0	0	0	43	42	42	43	43	43	26	25	25	0	0	0	129	127	127	17	17	17	0	0	0	43	42	42	43	43	43	26	25	25	0	0	0	129	127	127
POSFOU	18	18	18	0	0	0	40	39	39	40	39	39	16	14	14	0	0	0	114	110	110	18	18	18	0	0	0	40	39	39	40	39	39	16	14	14	0	0	0	114	110	110
QIVYUR	17	17	17	0	0	0	33	32	32	33	31	31	14	14	14	0	0	0	97	94	94	17	17	17	0	0	0	33	32	32	33	32	32	14	14	14	0	0	0	97	95	95
QIWCUW	29	29	29	0	0	0	66	64	64	66	65	62	42	38	38	0	0	0	203	196	193	29	29	29	0	0	0	66	64	64	66	66	60	42	38	38	0	0	0	203	197	191
QOKCID	18	18	18	0	0	0	49	49	47	49	49	40	22	18	18	0	0	0	138	134	123	18	18	18	0	0	0	49	47	47	49	49	48	22	19	19	0	0	0	138	133	132
QOTBAE	14	14	14	0	0	0	30	29	29	30	30	30	14	12	12	0	0	0	88	85	85	14	14	14	0	0	0	30	29	29	30	30	30	14	12	12	0	0	0	88	85	85
QUPHUF	18	18	18	0	0	0	70	67	67	70	68	60	44	42	42	0	0	0	202	195	187	18	18	18	0	0	0	70	67	67	70	68	67	44	44	44	0	0	0	202	197	196
QURSEC	11	11	11	0	0	0	42	41	41	42	42	42	20	18	18	0	0	0	115	112	112	11	11	11	0	0	0	42	41	41	42	42	42	20	18	18	0	0	0	115	112	112
REDROI	17	17	17	2	2	2	59	48	46	63	63	50	32	23	22	0	0	0	173	153	137	17	17	17	2	2	2	59	49	47	63	63	58	32	23	23	0	0	0	173	154	147
REYBAA	26	26	26	0	0	0	66	64	64	66	63	53	41	41	41	0	0	0	199	194	184	26	26	26	0	0	0	66	64	64	66	66	66	41	41	41	0	0	0	199	197	197
SOCLAZ	32	32	32	0	0	0	72	69	69	72	71	71	31	29	29	0	0	0	207	201	201	32	32	32	0	0	0	72	69	69	72	70	70	31	29	29	0	0	0	207	200	200
SOWCOY01	18	18	18	0	0	0	41	41	41	41	41	40	28	26	26	0	0	0	128	126	125	18	18	18	0	0	0	41	41	41	41	41	40	28	25	25	0	0	0	128	125	124
TUBLIN	29	29	29	0	0	0	89	85	85	89	84	78	50	48	48	0	0	0	257	246	240	29	29	29	0	0	0	89	85	85	89	88	87	50	48	48	0	0	0	257	250	249
VACFUB01	10	10	10	0	0	0	23	22	21	23	23	23	14	14	14	0	0	0	70	69	68	10	10	10	0	0	0	23	21	21	23	23	23	14	14	14	0	0	0	70	68	68
WECJAR	21	21	21	0	0	0	56	56	56	56	56	55	31	30	30	0	0	0	164	163	162	21	21	21	0	0	0	56	55	55	56	56	56	31	30	30	0	0	0	164	162	162
WOBHIF01	13	13	13	2	2	2	26	20	20	30	30	30	22	11	11	0	0	0	93	76	76	13	13	13	2	2	2	26	20	20	30	30	30	22	11	11	0	0	0	93	76	76
XAHROQ	8	8	8	0	0	0	21	20	20	21	21	21	9	9	9	8	4	4	67	62	62	8	8	8	0	0	0	21	20	20	21	21	21	9	9	9	8	3	3	67	61	61
XARCEB	26	26	26	0	0	0	56	53	53	56	56	56	24	21	21	0	0	0	162	156	156	26	26	26	0	0	0	56	52	52	56	56	55	24	21	21	0	0	0	162	155	154
XEDPIH	17	17	17	0	0	0	52	51	51	52	51	51	28	27	27	0	0	0	149	146	146	17	17	17	0	0	0	52	51	51	52	51	51	28	27	27	0	0	0	149	146	146
XEXMEU	22	22	22	0	0	0	59	56	56	59	59	56	38	35	35	0	0	0	178	172	169	22	22	22	0	0	0	59	56	56	59	59	59	38	35	35	0	0	0	178	172	172
YARKEJ	26	26	26	0	0	0	67	67	67	67	66	65	34	33	33	0	0	0	194	192	191	26	26	26	0	0	0	67	66	66	67	67	65	34	33	33	0	0	0	194	192	190
YARSIV	25	25	25	2	2	2	73	67	67	76	76	74	35	27	27	0	0	0	211	197	195	25	25	25	2	2	2	73	66	66	76	76	68	35	31	31	0	0	0	211	200	192
YUSGID	35	35	35	2	2	2	100	94	94	102	102	78	49	44	44	0	0	0	288	277	253	35	35	35	2	2	2	100	95	95	102	102	102	49	44	44	0	0	0	288	278	278
Number of k's for MOFs in Q1 (with no rotatable dihedrals, with no hindered dihedrals) without bond-bond cross terms
AFITEP	17	17	17	0	0	0	39	37	37	0	0	0	27	24	24	0	0	0	83	78	78	17	17	17	0	0	0	39	38	38	0	0	0	27	24	24	0	0	0	83	79	79
AMOYOR	18	18	18	0	0	0	49	48	48	0	0	0	24	22	22	0	0	0	91	88	88	18	18	18	0	0	0	49	48	48	0	0	0	24	22	21	0	0	0	91	88	87
ARAKAH	22	22	22	0	0	0	65	63	63	0	0	0	30	29	29	0	0	0	117	114	114	22	22	22	0	0	0	65	63	63	0	0	0	30	29	29	0	0	0	117	114	114
ARIBOS	22	22	22	0	0	0	62	53	53	0	0	0	37	35	35	0	0	0	121	110	110	22	22	22	0	0	0	62	53	53	0	0	0	37	35	35	0	0	0	121	110	110
ATOBIW	28	28	28	0	0	0	79	77	77	0	0	0	45	44	44	0	0	0	152	149	149	28	28	28	0	0	0	79	77	77	0	0	0	45	45	45	0	0	0	152	150	150
BOMCOX	24	24	24	0	0	0	86	80	80	0	0	0	80	77	77	0	0	0	190	181	181	24	24	24	0	0	0	86	80	79	0	0	0	80	78	77	0	0	0	190	182	180
BUSQIQ	12	12	12	1	1	1	40	22	22	0	0	0	18	11	11	0	0	0	71	46	46	12	12	12	1	1	1	40	22	22	0	0	0	18	11	11	0	0	0	71	46	46
BUVWOF03	24	24	24	0	0	0	51	51	51	0	0	0	47	42	42	0	0	0	122	117	117	24	24	24	0	0	0	51	51	51	0	0	0	47	42	42	0	0	0	122	117	117
BUVYIB	24	24	24	0	0	0	54	54	54	0	0	0	45	44	44	0	0	0	123	122	122	24	24	24	0	0	0	54	54	54	0	0	0	45	44	44	0	0	0	123	122	122
COMDOY	8	8	8	0	0	0	16	14	14	0	0	0	6	4	4	0	0	0	30	26	26	8	8	8	0	0	0	16	14	14	0	0	0	6	4	4	0	0	0	30	26	26
DIXJIF	21	21	21	0	0	0	57	56	56	0	0	0	26	25	25	0	0	0	104	102	102	21	21	21	0	0	0	57	56	56	0	0	0	26	25	25	0	0	0	104	102	102
DONNEA	8	8	8	0	0	0	21	19	18	0	0	0	8	6	6	0	0	0	37	33	32	8	8	8	0	0	0	21	19	18	0	0	0	8	6	6	0	0	0	37	33	32
DONNIE	7	7	7	0	0	0	15	12	12	0	0	0	6	5	4	0	0	0	28	24	23	7	7	7	0	0	0	15	12	12	0	0	0	6	5	4	0	0	0	28	24	23
EBEMII	22	22	22	2	2	2	58	54	54	0	0	0	47	39	39	0	0	0	129	117	117	22	22	22	2	2	2	58	55	55	0	0	0	47	38	38	0	0	0	129	117	117
EBOBIJ	15	15	15	0	0	0	31	31	31	0	0	0	14	13	13	0	0	0	60	59	59	15	15	15	0	0	0	31	31	31	0	0	0	14	13	13	0	0	0	60	59	59
EBOBUV	17	17	17	0	0	0	30	28	27	0	0	0	16	16	16	0	0	0	63	61	60	17	17	17	0	0	0	30	28	27	0	0	0	16	16	16	0	0	0	63	61	60
EKEHUZ	7	7	7	0	0	0	28	27	27	0	0	0	17	7	6	0	0	0	52	41	40	7	7	7	0	0	0	28	27	27	0	0	0	17	6	6	0	0	0	52	40	40
EMIVAY	29	29	29	0	0	0	73	73	73	0	0	0	33	29	29	0	0	0	135	131	131	29	29	29	0	0	0	73	73	73	0	0	0	33	29	29	0	0	0	135	131	131
EMOFIX	30	30	30	0	0	0	87	85	85	0	0	0	33	30	30	0	0	0	150	145	145	30	30	30	0	0	0	87	85	85	0	0	0	33	30	30	0	0	0	150	145	145
ESEDAJ	12	12	12	0	0	0	41	38	38	0	0	0	30	27	27	0	0	0	83	77	77	12	12	12	0	0	0	41	38	38	0	0	0	30	27	27	0	0	0	83	77	77
FIPWOS	28	28	28	0	0	0	59	58	58	0	0	0	18	14	14	0	0	0	105	100	100	28	28	28	0	0	0	59	58	58	0	0	0	18	14	14	0	0	0	105	100	100
FIPXEJ	31	31	31	0	0	0	114	112	112	0	0	0	37	31	31	0	0	0	182	174	174	31	31	31	0	0	0	114	113	113	0	0	0	37	31	31	0	0	0	182	175	175
FUBNOH	16	15	15	0	0	0	35	32	32	0	0	0	17	16	16	0	0	0	68	63	63	16	15	15	0	0	0	35	32	32	0	0	0	17	16	16	0	0	0	68	63	63
FURFOP	24	24	24	0	0	0	99	95	94	0	0	0	69	59	56	0	0	0	192	178	174	24	24	24	0	0	0	99	94	94	0	0	0	69	59	56	0	0	0	192	177	174
GUYLOC	18	18	18	0	0	0	55	54	54	0	0	0	30	29	29	0	0	0	103	101	101	18	18	18	0	0	0	55	54	54	0	0	0	30	29	29	0	0	0	103	101	101
GUYLUI	19	19	19	0	0	0	54	53	53	0	0	0	30	28	28	0	0	0	103	100	100	19	19	19	0	0	0	54	53	53	0	0	0	30	29	29	0	0	0	103	101	101
HECQUB	15	15	15	0	0	0	29	26	25	0	0	0	10	9	9	4	2	2	58	52	51	15	15	15	0	0	0	29	26	25	0	0	0	10	9	9	4	2	2	58	52	51
HIFTOG02	7	7	7	0	0	0	22	20	20	0	0	0	36	24	24	0	0	0	65	51	51	7	7	7	0	0	0	22	20	20	0	0	0	36	25	24	0	0	0	65	52	51
HIFVUO	6	6	6	0	0	0	23	23	23	0	0	0	35	19	19	0	0	0	64	48	48	6	6	6	0	0	0	23	23	23	0	0	0	35	19	19	0	0	0	64	48	48
HOZDOR	11	11	11	0	0	0	51	48	46	0	0	0	33	18	17	0	0	0	95	77	74	11	11	11	0	0	0	51	48	46	0	0	0	33	18	17	0	0	0	95	77	74
IBOCIO	22	22	22	0	0	0	102	101	101	0	0	0	56	41	39	0	0	0	180	164	162	22	22	22	0	0	0	102	100	99	0	0	0	56	43	38	0	0	0	180	165	159
KEWZOD	19	19	19	0	0	0	45	43	43	0	0	0	26	23	23	2	1	1	92	86	86	19	19	19	0	0	0	45	43	42	0	0	0	26	23	23	2	1	1	92	86	85
KINDIW	20	20	20	3	3	3	76	67	66	0	0	0	37	30	30	0	0	0	136	120	119	20	20	20	3	3	3	76	67	67	0	0	0	37	31	31	0	0	0	136	121	121
KURSOH	24	24	24	0	0	0	59	56	56	0	0	0	37	33	33	0	0	0	120	113	113	24	24	24	0	0	0	59	56	56	0	0	0	37	35	35	0	0	0	120	115	115
LALYOO	15	15	15	2	2	2	45	33	33	0	0	0	36	20	20	0	0	0	98	70	70	15	15	15	2	2	2	45	33	33	0	0	0	36	22	21	0	0	0	98	72	71
LIWXIZ	32	32	32	0	0	0	112	108	108	0	0	0	55	49	48	0	0	0	199	189	188	32	32	32	0	0	0	112	109	108	0	0	0	55	49	48	0	0	0	199	190	188
LODPOL	21	21	21	0	0	0	60	59	59	0	0	0	36	34	33	0	0	0	117	114	113	21	21	21	0	0	0	60	59	59	0	0	0	36	33	33	0	0	0	117	113	113
LOJLAZ	13	13	13	0	0	0	30	29	29	0	0	0	16	16	16	0	0	0	59	58	58	13	13	13	0	0	0	30	29	29	0	0	0	16	16	16	0	0	0	59	58	58
LUFCAS	18	18	18	0	0	0	41	36	36	0	0	0	19	18	18	0	0	0	78	72	72	18	18	18	0	0	0	41	36	36	0	0	0	19	18	18	0	0	0	78	72	72
MADVUJ	8	8	8	0	0	0	31	31	31	0	0	0	14	13	13	0	0	0	53	52	52	8	8	8	0	0	0	31	31	31	0	0	0	14	13	13	0	0	0	53	52	52
MADWAQ	8	8	8	0	0	0	32	32	32	0	0	0	21	20	20	0	0	0	61	60	60	8	8	8	0	0	0	32	32	32	0	0	0	21	21	20	0	0	0	61	61	60
MAZSUD	19	19	19	0	0	0	46	38	38	0	0	0	28	23	23	0	0	0	93	80	80	19	19	19	0	0	0	46	38	38	0	0	0	28	22	22	0	0	0	93	79	79
MEKDUC	20	20	20	0	0	0	49	47	46	0	0	0	33	31	31	0	0	0	102	98	97	20	20	20	0	0	0	49	47	47	0	0	0	33	31	31	0	0	0	102	98	98
MIBQAR01	7	7	7	0	0	0	11	10	10	0	0	0	6	5	5	0	0	0	24	22	22	7	7	7	0	0	0	11	10	10	0	0	0	6	5	5	0	0	0	24	22	22
MIZKOW	22	22	22	0	0	0	81	69	67	0	0	0	36	31	31	0	0	0	139	122	120	22	22	22	0	0	0	81	67	65	0	0	0	36	32	31	0	0	0	139	121	118
MOPFOO	13	13	13	0	0	0	27	27	27	0	0	0	12	10	10	0	0	0	52	50	50	13	13	13	0	0	0	27	27	26	0	0	0	12	9	9	0	0	0	52	49	48
MUGQAI	22	22	22	0	0	0	63	61	61	0	0	0	33	32	32	0	0	0	118	115	115	22	22	22	0	0	0	63	61	61	0	0	0	33	31	31	0	0	0	118	114	114
NEKREB	7	7	7	0	0	0	13	13	13	0	0	0	4	4	4	0	0	0	24	24	24	7	7	7	0	0	0	13	13	13	0	0	0	4	4	4	0	0	0	24	24	24
NOMQAJ01	19	18	18	0	0	0	45	41	41	0	0	0	35	34	34	0	0	0	99	93	93	19	18	18	0	0	0	45	41	41	0	0	0	35	34	34	0	0	0	99	93	93
OGIBUD	12	12	12	0	0	0	42	34	34	0	0	0	23	22	20	0	0	0	77	68	66	12	12	12	0	0	0	42	34	34	0	0	0	23	22	22	0	0	0	77	68	68
OJIWIO	22	22	22	0	0	0	58	57	57	0	0	0	38	36	35	0	0	0	118	115	114	22	22	22	0	0	0	58	57	57	0	0	0	38	35	35	0	0	0	118	114	114
OPOBIF	27	27	27	0	0	0	73	68	68	0	0	0	67	50	46	0	0	0	167	145	141	27	27	27	0	0	0	73	68	68	0	0	0	67	54	46	0	0	0	167	149	141
OVICUS	22	22	22	0	0	0	54	50	50	0	0	0	26	22	22	0	0	0	102	94	94	22	22	22	0	0	0	54	50	50	0	0	0	26	22	22	0	0	0	102	94	94
PEYPIU	19	19	19	0	0	0	78	77	76	0	0	0	62	56	56	0	0	0	159	152	151	19	19	19	0	0	0	78	77	77	0	0	0	62	57	56	0	0	0	159	153	152
PIXHUB	19	19	19	1	1	1	74	74	74	0	0	0	49	39	38	0	0	0	143	133	132	19	19	19	1	1	1	74	74	74	0	0	0	49	38	38	0	0	0	143	132	132
PORVUO	17	17	17	0	0	0	43	42	42	0	0	0	26	25	25	0	0	0	86	84	84	17	17	17	0	0	0	43	42	42	0	0	0	26	25	25	0	0	0	86	84	84
POSFOU	18	18	18	0	0	0	40	39	39	0	0	0	16	14	14	0	0	0	74	71	71	18	18	18	0	0	0	40	39	39	0	0	0	16	14	14	0	0	0	74	71	71
QIVYUR	17	17	17	0	0	0	33	32	32	0	0	0	14	14	14	0	0	0	64	63	63	17	17	17	0	0	0	33	32	32	0	0	0	14	14	14	0	0	0	64	63	63
QIWCUW	29	29	29	0	0	0	66	64	64	0	0	0	42	38	38	0	0	0	137	131	131	29	29	29	0	0	0	66	64	64	0	0	0	42	38	38	0	0	0	137	131	131
QOKCID	18	18	18	0	0	0	49	48	48	0	0	0	22	18	18	0	0	0	89	84	84	18	18	18	0	0	0	49	48	47	0	0	0	22	19	19	0	0	0	89	85	84
QOTBAE	14	14	14	0	0	0	30	29	29	0	0	0	14	12	12	0	0	0	58	55	55	14	14	14	0	0	0	30	29	29	0	0	0	14	12	12	0	0	0	58	55	55
QUPHUF	18	18	18	0	0	0	70	67	67	0	0	0	44	44	43	0	0	0	132	129	128	18	18	18	0	0	0	70	67	67	0	0	0	44	44	44	0	0	0	132	129	129
QURSEC	11	11	11	0	0	0	42	41	41	0	0	0	20	18	18	0	0	0	73	70	70	11	11	11	0	0	0	42	41	41	0	0	0	20	18	18	0	0	0	73	70	70
REDROI	17	17	17	2	2	2	59	45	45	0	0	0	32	25	25	0	0	0	110	89	89	17	17	17	2	2	2	59	45	45	0	0	0	32	24	24	0	0	0	110	88	88
REYBAA	26	26	26	0	0	0	66	64	64	0	0	0	41	41	41	0	0	0	133	131	131	26	26	26	0	0	0	66	65	65	0	0	0	41	41	41	0	0	0	133	132	132
SOCLAZ	32	32	32	0	0	0	72	70	70	0	0	0	31	30	29	0	0	0	135	132	131	32	32	32	0	0	0	72	70	70	0	0	0	31	30	30	0	0	0	135	132	132
SOWCOY01	18	18	18	0	0	0	41	41	41	0	0	0	28	26	25	0	0	0	87	85	84	18	18	18	0	0	0	41	41	41	0	0	0	28	26	25	0	0	0	87	85	84
TUBLIN	29	29	29	0	0	0	89	86	86	0	0	0	50	48	48	0	0	0	168	163	163	29	29	29	0	0	0	89	86	86	0	0	0	50	48	48	0	0	0	168	163	163
VACFUB01	10	10	10	0	0	0	23	21	21	0	0	0	14	14	13	0	0	0	47	45	44	10	10	10	0	0	0	23	22	21	0	0	0	14	14	13	0	0	0	47	46	44
WECJAR	21	21	21	0	0	0	56	55	55	0	0	0	31	30	30	0	0	0	108	106	106	21	21	21	0	0	0	56	56	56	0	0	0	31	30	30	0	0	0	108	107	107
WOBHIF01	13	13	13	2	2	2	26	16	15	0	0	0	22	13	13	0	0	0	63	44	43	13	13	13	2	2	2	26	16	15	0	0	0	22	13	13	0	0	0	63	44	43
XAHROQ	8	8	8	0	0	0	21	20	19	0	0	0	9	9	9	8	4	3	46	41	39	8	8	8	0	0	0	21	20	19	0	0	0	9	9	9	8	3	2	46	40	38
XARCEB	26	25	25	0	0	0	56	53	53	0	0	0	24	21	21	0	0	0	106	99	99	26	25	25	0	0	0	56	53	53	0	0	0	24	21	21	0	0	0	106	99	99
XEDPIH	17	17	17	0	0	0	52	51	51	0	0	0	28	27	27	0	0	0	97	95	95	17	17	17	0	0	0	52	51	51	0	0	0	28	27	27	0	0	0	97	95	95
XEXMEU	22	22	22	0	0	0	59	57	56	0	0	0	38	35	35	0	0	0	119	114	113	22	22	22	0	0	0	59	56	56	0	0	0	38	35	35	0	0	0	119	113	113
YARKEJ	26	26	26	0	0	0	67	67	67	0	0	0	34	33	33	0	0	0	127	126	126	26	26	26	0	0	0	67	67	67	0	0	0	34	33	33	0	0	0	127	126	126
YARSIV	25	25	25	2	2	2	73	65	65	0	0	0	35	26	26	0	0	0	135	118	118	25	25	25	2	2	2	73	66	66	0	0	0	35	29	29	0	0	0	135	122	122
YUSGID	35	35	35	2	2	2	100	96	95	0	0	0	49	43	43	0	0	0	186	176	175	35	35	35	2	2	2	100	96	96	0	0	0	49	43	43	0	0	0	186	176	176
Number of k's for MOFs in Q2 (with no rotatable dihedrals, with at least one hindered dihedrals) with bond-bond cross terms
XORGUI	24	24	24	0	0	0	41	40	40	41	41	41	21	19	19	0	0	0	127	124	124	24	24	24	0	0	0	41	40	40	41	41	41	21	19	19	0	0	0	127	124	124
Number of k's for MOFs in Q2 (with no rotatable dihedrals, with at least one hindered dihedrals) without bond-bond cross terms
XORGUI	24	24	24	0	0	0	41	40	40	0	0	0	21	20	20	0	0	0	86	84	84	24	24	24	0	0	0	41	40	40	0	0	0	21	20	20	0	0	0	86	84	84

## Sheet: MOFs_Q3_Q4_number_of_k's
MOF_name	#k's bond_stretch_TA_avg	#k's bond_stretch_lambda0_avg	#k's bond_stretch_lambda_best_avg	#k's UB_stretch_TA_avg	#k's UB_stretch_lambda0_avg	#k's UB_stretch_lambda_best_avg	#k's bends_TA_avg	#k's bends_lambda0_avg	#k's bends_lambda_best_avg	#k's bond_bond_cross_TA_avg	#k's bond_bond_cross_lambda0_avg	#k's bond_bond_cross_lambda_best_avg	#k's NR_hind_dihed_TA_avg	#k's NR_hind_dihed_lambda0_avg	#k's NR_hind_dihed_lambda_best_avg	#k's dihed_with_linear_bond_angle_TA_avg	#k's dihed_with_linear_bond_angle_lambda0_avg	#k's dihed_with_linear_bond_angle_lambda_best_avg	#k's rot_dihed_TA_avg	#k's rot_dihed_lambda0_avg	#k's rot_dihed_lambda_best_avg	#k's tot_TA_avg	#k's tot_lambda0_avg	#k's tot_lambda_best_avg	#k's bond_stretch_TA_ind	#k's bond_stretch_lambda0_ind	#k's bond_stretch_lambda_best_ind	#k's UB_stretch_TA_ind	#k's UB_stretch_lambda0_ind	#k's UB_stretch_lambda_best_ind	#k's bends_TA_ind	#k's bends_lambda0_ind	#k's bends_lambda_best_ind	#k's bond_bond_cross_TA_ind	#k's bond_bond_cross_lambda0_ind	#k's bond_bond_cross_lambda_best_ind	#k's NR_hind_dihed_TA_ind	#k's NR_hind_dihed_lambda0_ind	#k's NR_hind_dihed_lambda_best_ind	#k's dihed_with_linear_bond_angle_TA_ind	#k's dihed_with_linear_bond_angle_lambda0_ind	#k's dihed_with_linear_bond_angle_lambda_best_ind	#k's rot_dihed_TA_ind	#k's rot_dihed_lambda0_ind	#k's rot_dihed_lambda_best_ind	#k's tot_TA_ind	#k's tot_lambda0_ind	#k's tot_lambda_best_ind
Number of k's for MOFs in Q3 (with at least one rotatable dihedrals, with no hindered dihedrals) with bond-bond cross terms
ATOXEN	21	21	21	0	0	0	77	73	71	77	77	65	54	50	50	0	0	0	2	2	2	231	223	209	21	21	21	0	0	0	77	73	73	77	77	77	54	50	50	0	0	0	2	2	2	231	223	223
BEPMEQ	20	20	20	0	0	0	53	52	52	53	50	38	32	20	20	0	0	0	1	1	1	159	143	131	20	20	20	0	0	0	53	52	52	53	52	48	32	20	20	0	0	0	1	1	1	159	145	141
BEPNUH	21	21	21	0	0	0	57	54	54	57	56	54	48	29	29	0	0	0	3	3	3	186	163	161	21	21	21	0	0	0	57	54	54	57	57	57	48	28	28	0	0	0	3	3	3	186	163	163
BEPVID	25	25	25	0	0	0	70	68	68	70	69	68	33	29	29	6	3	3	17	14	14	221	208	207	25	25	25	0	0	0	70	68	68	70	69	69	33	29	29	6	3	3	17	14	14	221	208	208
BIBBUL	29	29	29	0	0	0	84	83	83	84	78	78	41	36	36	0	0	0	3	3	3	241	229	229	29	29	29	0	0	0	84	83	83	84	81	80	41	36	36	0	0	0	3	3	3	241	232	231
BUYDEG	17	17	17	0	0	0	34	32	32	34	33	33	15	13	13	0	0	0	4	4	4	104	99	99	17	17	17	0	0	0	34	32	32	34	33	33	15	13	13	0	0	0	4	4	4	104	99	99
CEGDUO	11	11	11	0	0	0	33	32	32	33	32	28	17	16	14	0	0	0	3	3	3	97	94	88	11	11	11	0	0	0	33	32	32	33	33	32	17	16	16	0	0	0	3	3	3	97	95	94
CEGFAW	12	12	12	0	0	0	45	40	40	45	41	40	44	38	37	0	0	0	5	5	5	151	136	134	12	12	12	0	0	0	45	40	39	45	42	39	44	39	36	0	0	0	5	5	5	151	138	131
CUQRIR	17	17	17	0	0	0	50	50	50	50	48	44	20	17	17	0	0	0	4	4	4	141	136	132	17	17	17	0	0	0	50	50	50	50	50	49	20	17	17	0	0	0	4	4	4	141	138	137
ESIFIX	18	18	18	0	0	0	44	38	38	44	42	41	21	13	13	0	0	0	6	6	6	133	117	116	18	18	18	0	0	0	44	38	38	44	44	44	21	13	13	0	0	0	6	6	6	133	119	119
EWUGEK	23	23	23	0	0	0	90	79	79	90	84	75	44	31	29	0	0	0	2	2	2	249	219	208	23	23	23	0	0	0	90	79	79	90	87	86	44	32	30	0	0	0	2	2	2	249	223	220
FOCYUT	24	24	24	4	4	4	85	72	72	91	89	89	57	52	52	0	0	0	4	4	4	265	245	245	24	24	24	4	4	4	85	71	71	91	89	89	57	52	52	0	0	0	4	4	4	265	244	244
GIRYIR	33	33	33	0	0	0	79	76	76	79	79	79	53	49	49	0	0	0	6	5	5	250	242	242	33	33	33	0	0	0	79	76	76	79	79	79	53	49	49	0	0	0	6	4	4	250	241	241
GIWMOP	23	23	23	0	0	0	48	40	39	48	47	32	17	13	13	4	3	2	2	2	2	142	128	111	23	23	23	0	0	0	48	42	42	48	48	48	17	12	12	4	2	2	2	2	2	142	129	129
GULPIN	24	24	24	0	0	0	66	64	64	66	66	64	32	31	30	0	0	0	1	1	1	189	186	183	24	24	24	0	0	0	66	63	63	66	66	66	32	31	31	0	0	0	1	1	1	189	185	185
GUMDEZ	18	18	18	0	0	0	50	49	49	50	48	43	22	15	15	0	0	0	2	2	2	142	132	127	18	18	18	0	0	0	50	50	50	50	50	50	22	15	15	0	0	0	2	2	2	142	135	135
HEBZAR	17	17	17	0	0	0	40	35	35	40	40	40	29	26	26	0	0	0	5	5	5	131	123	123	17	17	17	0	0	0	40	36	36	40	40	40	29	24	24	0	0	0	5	5	5	131	122	122
HEBZEV	17	17	17	0	0	0	38	34	34	38	37	37	27	19	19	0	0	0	1	1	1	121	108	108	17	17	17	0	0	0	38	35	35	38	37	37	27	19	19	0	0	0	1	1	1	121	109	109
HIHJUF	18	18	18	0	0	0	34	31	31	34	34	34	23	16	16	0	0	0	1	1	1	110	100	100	18	18	18	0	0	0	34	31	31	34	34	34	23	16	16	0	0	0	1	1	1	110	100	100
HOXGEH	23	23	23	2	2	2	68	66	65	70	64	41	40	27	26	0	0	0	19	14	11	222	196	168	23	23	23	2	2	2	68	66	66	70	65	62	40	25	25	0	0	0	19	14	12	222	195	190
JIVFUQ	13	13	13	0	0	0	23	21	21	23	22	22	8	5	5	0	0	0	6	6	6	73	67	67	13	13	13	0	0	0	23	21	21	23	22	22	8	5	5	0	0	0	6	6	6	73	67	67
KACZUM	23	23	23	0	0	0	41	41	41	41	41	38	17	16	16	0	0	0	4	4	4	126	125	122	23	23	23	0	0	0	41	41	41	41	41	38	17	16	16	0	0	0	4	4	4	126	125	122
KATDAM	36	36	36	0	0	0	100	99	99	100	96	93	66	65	65	0	0	0	6	6	6	308	302	299	36	36	36	0	0	0	100	99	99	100	99	99	66	65	65	0	0	0	6	6	6	308	305	305
KINJUO	35	35	35	2	2	2	101	99	99	105	101	99	61	60	60	0	0	0	3	3	3	307	300	298	35	35	35	2	2	2	101	98	98	105	103	100	61	61	60	0	0	0	3	3	3	307	302	298
MEJQID	25	25	25	0	0	0	50	49	49	50	50	49	22	20	20	0	0	0	1	1	1	148	145	144	25	25	25	0	0	0	50	49	49	50	50	49	22	20	20	0	0	0	1	1	1	148	145	144
OTOZOO	26	26	26	0	0	0	66	62	62	66	66	66	31	27	27	0	0	0	4	4	4	193	185	185	26	26	26	0	0	0	66	63	63	66	66	66	31	27	27	0	0	0	4	4	4	193	186	186
PEGBEK01	20	20	20	0	0	0	73	71	71	73	73	72	37	31	31	0	0	0	8	8	8	211	203	202	20	20	20	0	0	0	73	71	71	73	73	73	37	30	30	0	0	0	8	8	8	211	202	202
PITMOW	35	35	35	0	0	0	108	104	104	108	106	101	67	64	63	0	0	0	5	5	5	323	314	308	35	35	35	0	0	0	108	104	104	108	108	104	67	64	62	0	0	0	5	5	5	323	316	310
PUFVUJ	31	31	31	2	2	2	66	63	63	68	68	68	24	23	23	0	0	0	2	2	2	193	189	189	31	31	31	2	2	2	66	63	63	68	68	68	24	23	23	0	0	0	2	2	2	193	189	189
QESYOD	11	11	11	0	0	0	49	43	43	49	48	48	74	48	45	0	0	0	9	9	9	192	159	156	11	11	11	0	0	0	49	43	43	49	48	48	74	46	46	0	0	0	9	9	9	192	157	157
SARBOE	19	19	19	0	0	0	49	47	47	49	49	49	22	20	19	0	0	0	5	5	5	144	140	139	19	19	19	0	0	0	49	47	47	49	49	49	22	20	20	0	0	0	5	5	5	144	140	140
SARBUK	16	16	16	0	0	0	28	27	27	28	27	27	12	10	10	0	0	0	1	1	1	85	81	81	16	16	16	0	0	0	28	27	27	28	27	27	12	10	9	0	0	0	1	1	1	85	81	80
TEPGUS	30	30	30	0	0	0	57	56	56	57	57	57	22	19	19	0	0	0	5	5	5	171	167	167	30	30	30	0	0	0	57	56	56	57	57	55	22	19	19	0	0	0	5	5	5	171	167	165
UKALEZ	20	20	20	0	0	0	55	54	54	55	55	55	24	23	23	0	0	0	6	6	6	160	158	158	20	20	20	0	0	0	55	54	54	55	55	55	24	22	22	0	0	0	6	6	6	160	157	157
WIYFAM	14	14	14	0	0	0	28	28	28	28	28	26	11	9	8	0	0	0	3	3	3	84	82	79	14	14	14	0	0	0	28	28	28	28	28	28	11	9	8	0	0	0	3	3	3	84	82	81
Number of k's for MOFs in Q3 (with at least one rotatable dihedrals, with no hindered dihedrals) without bond-bond cross terms
ATOXEN	21	21	21	0	0	0	77	72	72	0	0	0	54	51	51	0	0	0	2	2	2	154	146	146	21	21	21	0	0	0	77	72	71	0	0	0	54	51	51	0	0	0	2	2	2	154	146	145
BEPMEQ	20	20	20	0	0	0	53	52	52	0	0	0	32	20	20	0	0	0	1	1	1	106	93	93	20	20	20	0	0	0	53	53	53	0	0	0	32	20	20	0	0	0	1	1	1	106	94	94
BEPNUH	21	21	21	0	0	0	57	55	55	0	0	0	48	28	28	0	0	0	3	2	2	129	106	106	21	21	21	0	0	0	57	55	55	0	0	0	48	28	28	0	0	0	3	2	2	129	106	106
BEPVID	25	25	25	0	0	0	70	68	68	0	0	0	33	29	29	6	3	3	6	3	3	151	139	139	25	25	25	0	0	0	70	67	67	0	0	0	33	28	28	6	3	3	6	3	3	151	137	137
BIBBUL	29	29	29	0	0	0	84	83	83	0	0	0	41	35	35	0	0	0	3	3	3	157	150	150	29	29	29	0	0	0	84	82	82	0	0	0	41	36	35	0	0	0	3	3	3	157	150	149
BUYDEG	17	17	17	0	0	0	34	32	32	0	0	0	15	13	13	0	0	0	4	4	4	70	66	66	17	17	17	0	0	0	34	32	32	0	0	0	15	13	13	0	0	0	4	4	4	70	66	66
CEGDUO	11	11	11	0	0	0	33	32	32	0	0	0	17	15	14	0	0	0	3	3	3	64	61	60	11	11	11	0	0	0	33	32	32	0	0	0	17	15	14	0	0	0	3	3	3	64	61	60
CEGFAW	12	12	12	0	0	0	45	40	40	0	0	0	44	37	37	0	0	0	5	5	5	106	94	94	12	12	12	0	0	0	45	41	38	0	0	0	44	38	36	0	0	0	5	5	5	106	96	91
CUQRIR	17	17	17	0	0	0	50	50	50	0	0	0	20	17	17	0	0	0	4	4	4	91	88	88	17	17	17	0	0	0	50	50	50	0	0	0	20	17	17	0	0	0	4	4	4	91	88	88
ESIFIX	18	18	18	0	0	0	44	38	38	0	0	0	21	13	13	0	0	0	6	6	6	89	75	75	18	18	18	0	0	0	44	38	38	0	0	0	21	13	13	0	0	0	6	6	6	89	75	75
EWUGEK	23	23	23	0	0	0	90	83	83	0	0	0	44	31	29	0	0	0	2	2	2	159	139	137	23	23	23	0	0	0	90	83	83	0	0	0	44	31	29	0	0	0	2	2	2	159	139	137
FOCYUT	24	23	23	4	4	4	85	70	70	0	0	0	57	50	49	0	0	0	4	4	4	174	151	150	24	23	23	4	4	4	85	69	68	0	0	0	57	50	49	0	0	0	4	4	4	174	150	148
GIRYIR	33	33	33	0	0	0	79	75	74	0	0	0	53	49	49	0	0	0	6	5	4	171	162	160	33	33	33	0	0	0	79	75	75	0	0	0	53	49	49	0	0	0	6	4	4	171	161	161
GIWMOP	23	23	23	0	0	0	48	40	39	0	0	0	17	13	13	4	2	2	4	2	2	94	80	79	23	23	23	0	0	0	48	43	43	0	0	0	17	13	13	4	2	2	4	2	2	94	83	83
GULPIN	24	24	24	0	0	0	66	63	63	0	0	0	32	31	31	0	0	0	1	1	1	123	119	119	24	24	24	0	0	0	66	63	63	0	0	0	32	31	31	0	0	0	1	1	1	123	119	119
GUMDEZ	18	18	18	0	0	0	50	49	49	0	0	0	22	16	16	0	0	0	2	2	2	92	85	85	18	18	18	0	0	0	50	49	49	0	0	0	22	17	17	0	0	0	2	2	2	92	86	86
HEBZAR	17	17	17	0	0	0	40	37	37	0	0	0	29	25	25	0	0	0	5	5	5	91	84	84	17	17	17	0	0	0	40	37	37	0	0	0	29	24	24	0	0	0	5	5	5	91	83	83
HEBZEV	17	17	17	0	0	0	38	35	35	0	0	0	27	20	20	0	0	0	1	1	1	83	73	73	17	17	17	0	0	0	38	34	34	0	0	0	27	19	19	0	0	0	1	1	1	83	71	71
HIHJUF	18	18	18	0	0	0	34	31	31	0	0	0	23	16	16	0	0	0	1	1	1	76	66	66	18	18	18	0	0	0	34	31	31	0	0	0	23	16	16	0	0	0	1	1	1	76	66	66
HOXGEH	23	23	23	2	2	2	68	64	64	0	0	0	40	30	30	0	0	0	19	11	11	152	130	130	23	23	23	2	2	2	68	64	64	0	0	0	40	29	29	0	0	0	19	11	10	152	129	128
JIVFUQ	13	13	13	0	0	0	23	22	22	0	0	0	8	5	5	0	0	0	6	6	6	50	46	46	13	13	13	0	0	0	23	22	22	0	0	0	8	5	5	0	0	0	6	6	6	50	46	46
KACZUM	23	23	23	0	0	0	41	41	41	0	0	0	17	16	16	0	0	0	4	4	4	85	84	84	23	23	23	0	0	0	41	41	41	0	0	0	17	16	16	0	0	0	4	4	4	85	84	84
KATDAM	36	36	36	0	0	0	100	100	100	0	0	0	66	65	65	0	0	0	6	6	6	208	207	207	36	36	36	0	0	0	100	100	100	0	0	0	66	65	65	0	0	0	6	6	6	208	207	207
KINJUO	35	35	35	2	2	2	101	101	101	0	0	0	61	60	60	0	0	0	3	3	3	202	201	201	35	35	35	2	2	2	101	101	101	0	0	0	61	60	60	0	0	0	3	3	3	202	201	201
MEJQID	25	25	25	0	0	0	50	49	49	0	0	0	22	20	20	0	0	0	1	1	1	98	95	95	25	25	25	0	0	0	50	49	49	0	0	0	22	20	20	0	0	0	1	1	1	98	95	95
OTOZOO	26	26	26	0	0	0	66	63	63	0	0	0	31	28	28	0	0	0	4	4	4	127	121	121	26	26	26	0	0	0	66	63	63	0	0	0	31	28	28	0	0	0	4	4	4	127	121	121
PEGBEK01	20	20	20	0	0	0	73	70	70	0	0	0	37	31	31	0	0	0	8	8	8	138	129	129	20	20	20	0	0	0	73	71	70	0	0	0	37	30	30	0	0	0	8	8	8	138	129	128
PITMOW	35	35	35	0	0	0	108	103	103	0	0	0	67	63	63	0	0	0	5	5	5	215	206	206	35	35	35	0	0	0	108	104	104	0	0	0	67	63	63	0	0	0	5	5	5	215	207	207
PUFVUJ	31	31	31	2	2	2	66	64	64	0	0	0	24	21	21	0	0	0	2	2	2	125	120	120	31	31	31	2	2	2	66	64	64	0	0	0	24	21	21	0	0	0	2	2	2	125	120	120
QESYOD	11	11	11	0	0	0	49	47	47	0	0	0	74	45	45	0	0	0	9	8	8	143	111	111	11	11	11	0	0	0	49	47	47	0	0	0	74	45	45	0	0	0	9	8	8	143	111	111
SARBOE	19	19	19	0	0	0	49	47	47	0	0	0	22	20	20	0	0	0	5	5	5	95	91	91	19	19	19	0	0	0	49	47	47	0	0	0	22	21	21	0	0	0	5	5	5	95	92	92
SARBUK	16	16	16	0	0	0	28	27	27	0	0	0	12	10	9	0	0	0	1	1	1	57	54	53	16	16	16	0	0	0	28	27	27	0	0	0	12	10	10	0	0	0	1	1	1	57	54	54
TEPGUS	30	30	30	0	0	0	57	56	56	0	0	0	22	19	18	0	0	0	5	5	5	114	110	109	30	30	30	0	0	0	57	56	56	0	0	0	22	19	18	0	0	0	5	5	5	114	110	109
UKALEZ	20	20	20	0	0	0	55	54	54	0	0	0	24	22	22	0	0	0	6	6	6	105	102	102	20	20	20	0	0	0	55	53	53	0	0	0	24	22	22	0	0	0	6	6	6	105	101	101
WIYFAM	14	14	14	0	0	0	28	28	28	0	0	0	11	8	8	0	0	0	3	3	3	56	53	53	14	14	14	0	0	0	28	28	28	0	0	0	11	8	8	0	0	0	3	3	3	56	53	53
Number of k's for MOFs in Q4 (with at least one rotatable dihedrals, with at least one hindered dihedrals) with bond-bond cross terms
IBICED	22	22	22	0	0	0	60	59	59	60	57	57	43	30	30	0	0	0	2	2	2	187	170	170	22	22	22	0	0	0	60	58	58	60	59	59	43	29	29	0	0	0	2	2	2	187	170	170
TUMDEM	28	28	28	2	2	2	61	61	61	65	63	42	26	24	24	0	0	0	4	4	4	186	182	161	28	28	28	2	2	2	61	61	61	65	64	63	26	24	24	0	0	0	4	4	4	186	183	182
Number of k's for MOFs in Q4 (with at least one rotatable dihedrals, with at least one hindered dihedrals) without bond-bond cross terms
IBICED	22	22	22	0	0	0	60	60	60	0	0	0	43	30	30	0	0	0	2	2	2	127	114	114	22	22	22	0	0	0	60	59	59	0	0	0	43	30	30	0	0	0	2	2	2	127	113	113
TUMDEM	28	28	28	2	2	2	61	61	61	0	0	0	26	22	22	0	0	0	4	4	4	121	117	117	28	28	28	2	2	2	61	61	61	0	0	0	26	22	22	0	0	0	4	4	4	121	117	117
